# Supplementary material for: Chemoselective alcoholysis/acetolysis of trans-ketals over cis-ketals and its application in the total synthesis of the cellular second messenger, d-myo-inositol-1,4,5-trisphosphate
Source: Royal Society of Chemistry journal article supplement (doi:10.1039/c3ob40789f), 2013-01-01
Supplement: c3ob40789f.pdf [file c3ob40789f.pdf]

## ESI for

### Chemoselective alcoholysis/acetolysis of *trans*-ketals over *cis*-ketals: Total synthesis of the cellular second messenger, *D*-*myo*-inositol-1,4,5-trisphosphate

Adiyala Vidyasagar, Atchutarao Pathigoola and Kana M. Sureshan\*

*School of Chemistry,*

*Indian Institute of Science Education and Research, Thiruvananthapuram,*

*Thiruvananthapuram – 695016, India.*

## INDEX

|                                                                                       |     |
|---------------------------------------------------------------------------------------|-----|
| • Crystal structure of <b>24a</b>                                                     | S3  |
| • <sup>1</sup> H NMR, COSY, <sup>13</sup> C NMR, DEPT and HMQC of compound <b>12a</b> | S4  |
| • <sup>1</sup> H NMR, COSY, <sup>13</sup> C NMR, DEPT and HMQC of compound <b>13c</b> | S7  |
| • <sup>1</sup> H NMR, COSY, <sup>13</sup> C NMR, DEPT and HMQC of compound <b>16c</b> | S10 |
| • <sup>1</sup> H NMR, COSY and <sup>13</sup> C NMR of compound <b>21a</b>             | S14 |
| • <sup>1</sup> H NMR, COSY, <sup>13</sup> C NMR, DEPT and HMQC of compound <b>22b</b> | S16 |
| • <sup>1</sup> H NMR, COSY, <sup>13</sup> C NMR, DEPT and HMQC of compound <b>22c</b> | S19 |
| • <sup>1</sup> H NMR, COSY, <sup>13</sup> C NMR, DEPT and HMQC of compound <b>23b</b> | S23 |
| • <sup>1</sup> H NMR, COSY, <sup>13</sup> C NMR, DEPT and HMQC of compound <b>24b</b> | S25 |
| • <sup>1</sup> H NMR, COSY, <sup>13</sup> C NMR, DEPT and HMQC of compound <b>26a</b> | S28 |
| • <sup>1</sup> H NMR, COSY, <sup>13</sup> C NMR, DEPT and HMQC of compound <b>27a</b> | S31 |

|                                                                                     |     |
|-------------------------------------------------------------------------------------|-----|
| • $^1\text{H}$ NMR, COSY, $^{13}\text{C}$ NMR, DEPT and HMQC of compound <b>27b</b> | S34 |
| • $^1\text{H}$ NMR of compound (+)- <b>35</b>                                       | S37 |
| • $^{31}\text{P}$ NMR of compound (+)- <b>35</b>                                    | S38 |
| • $^1\text{H}$ NMR of compound (+)- <b>36</b>                                       | S38 |
| • $^{31}\text{P}$ NMR of compound (+)- <b>36</b>                                    | S39 |
| • $^{31}\text{P}$ NMR of crude after phosphorylation with $\text{POCl}_3$           | S39 |
| • $^1\text{H}$ NMR of compound <b>5</b> ( <b>IP<sub>3</sub></b> )                   | S40 |
| • $^{31}\text{P}$ NMR of compound <b>5</b> ( <b>IP<sub>3</sub></b> )                | S40 |

## Crystal structure of 24a

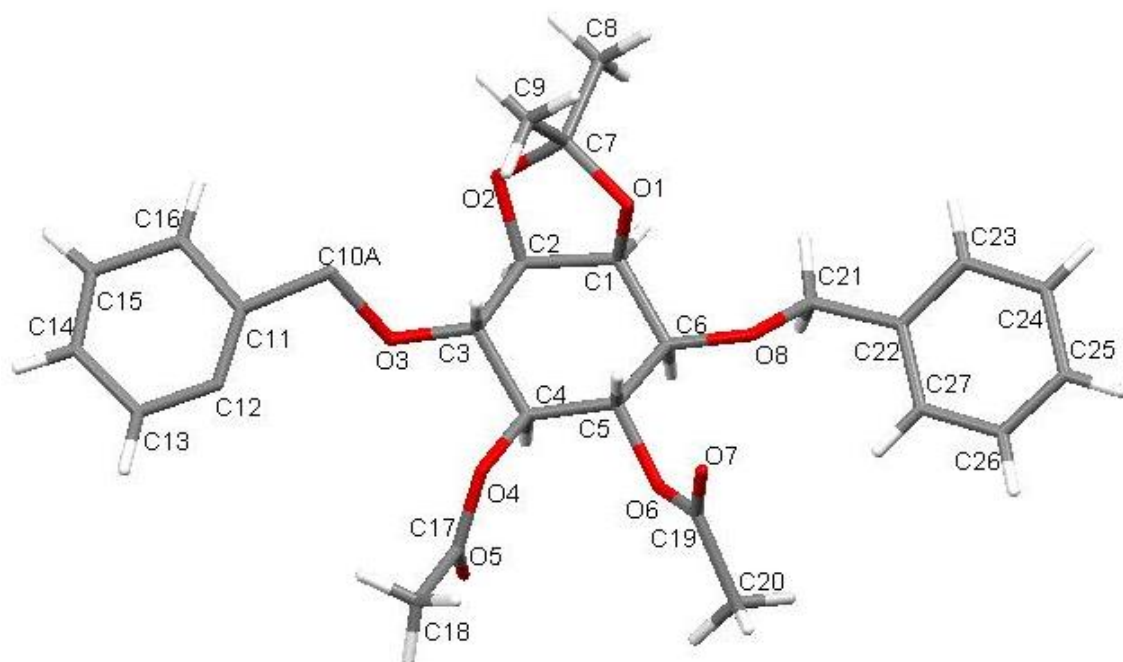

# <sup>1</sup>H NMR of compound 12a

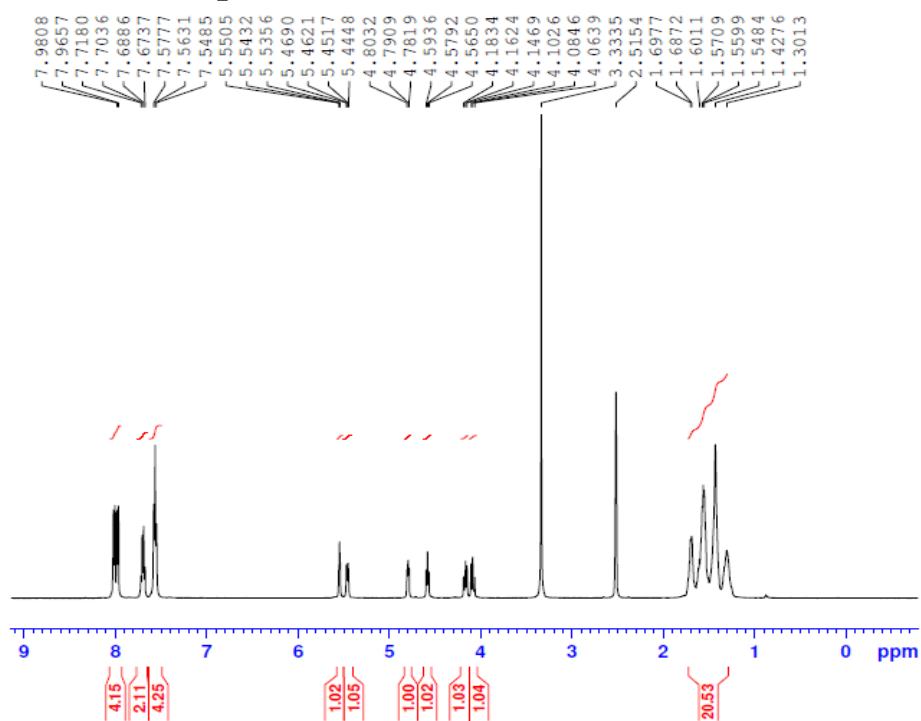

## COSY of compound 12a

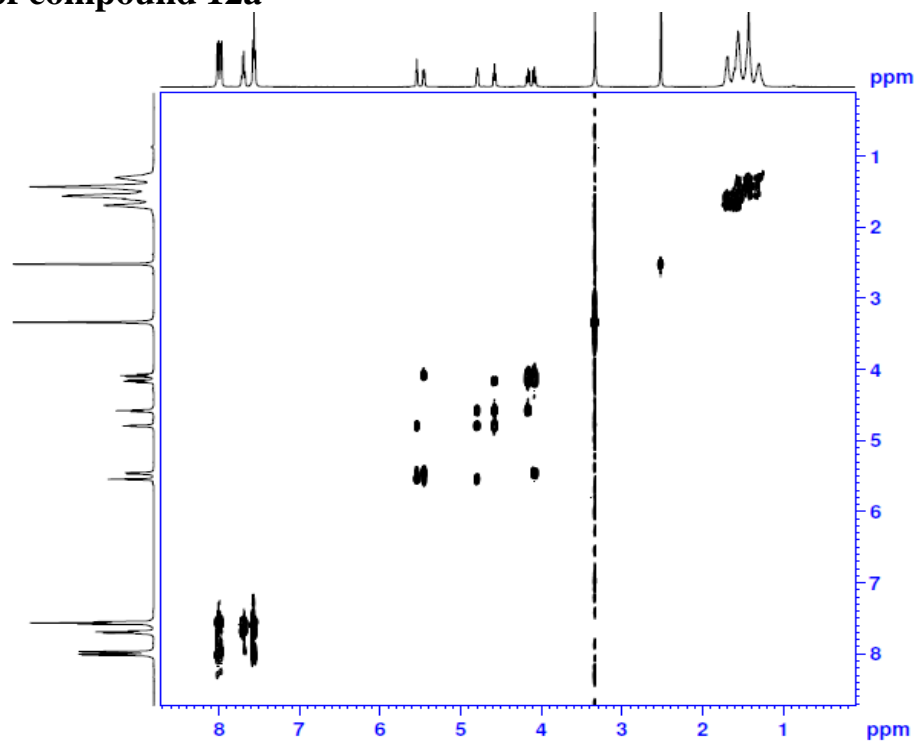

## COSY of compound 12a(zoom)

KMS-B-V-29-DMSO  
COSYGPW E:\ IISER

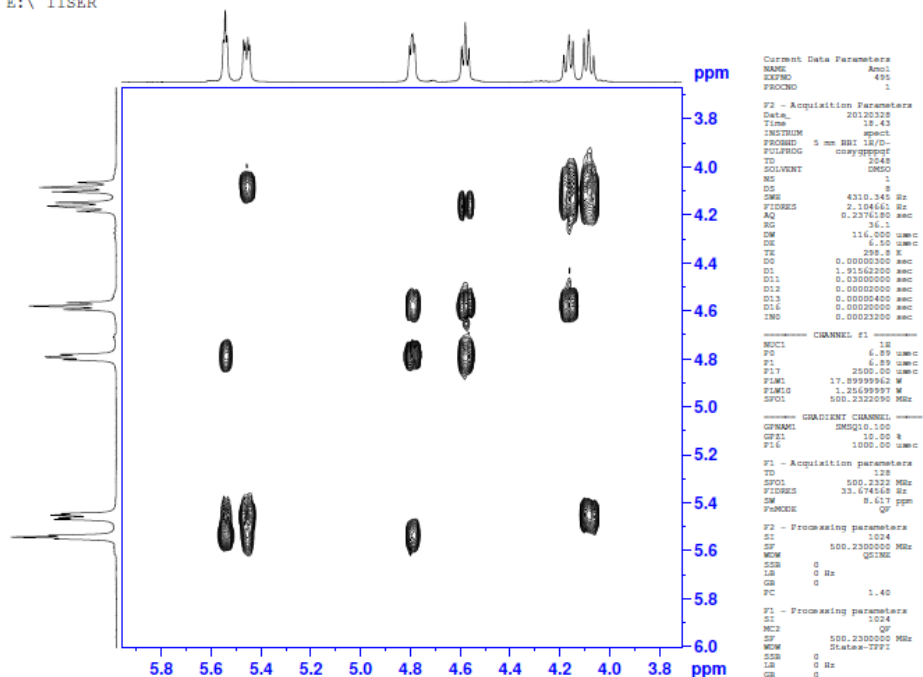

## DEPT-135 of compound 12a

KMS-B-V-29  
C13DEPT135 E:\ IISER

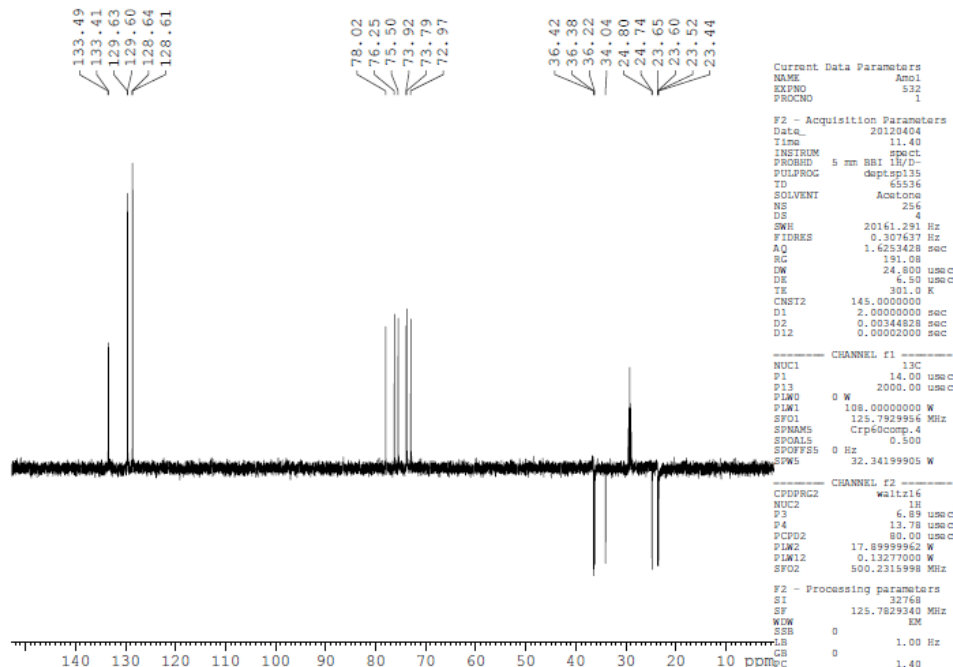

**<sup>13</sup>C NMR of compound 12a**

KMS-B-V-29  
C13CPD E:\ IISER

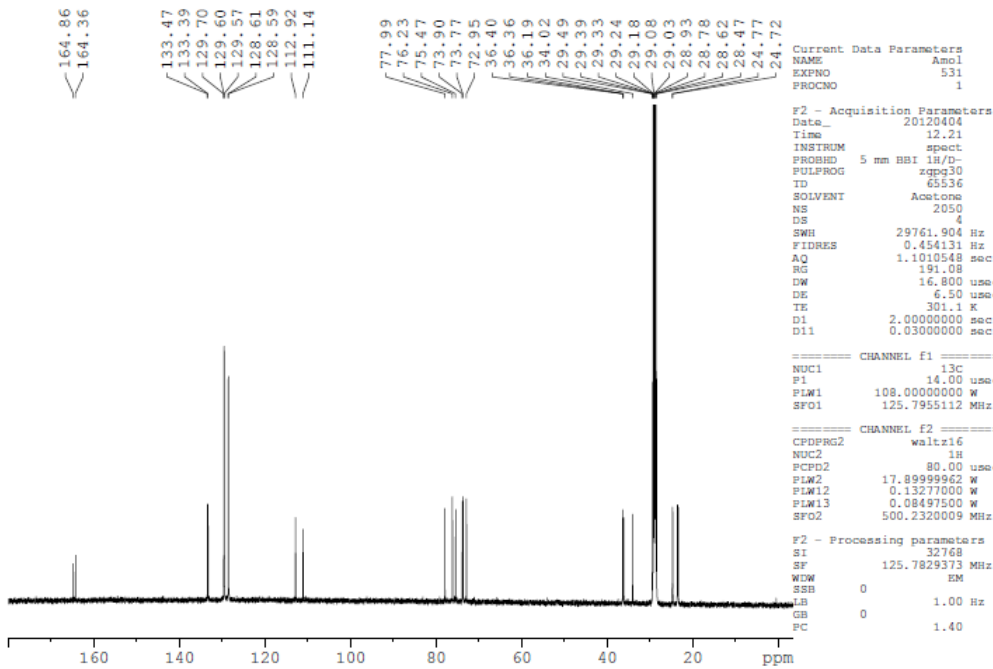

**HMQC of compound 12a**

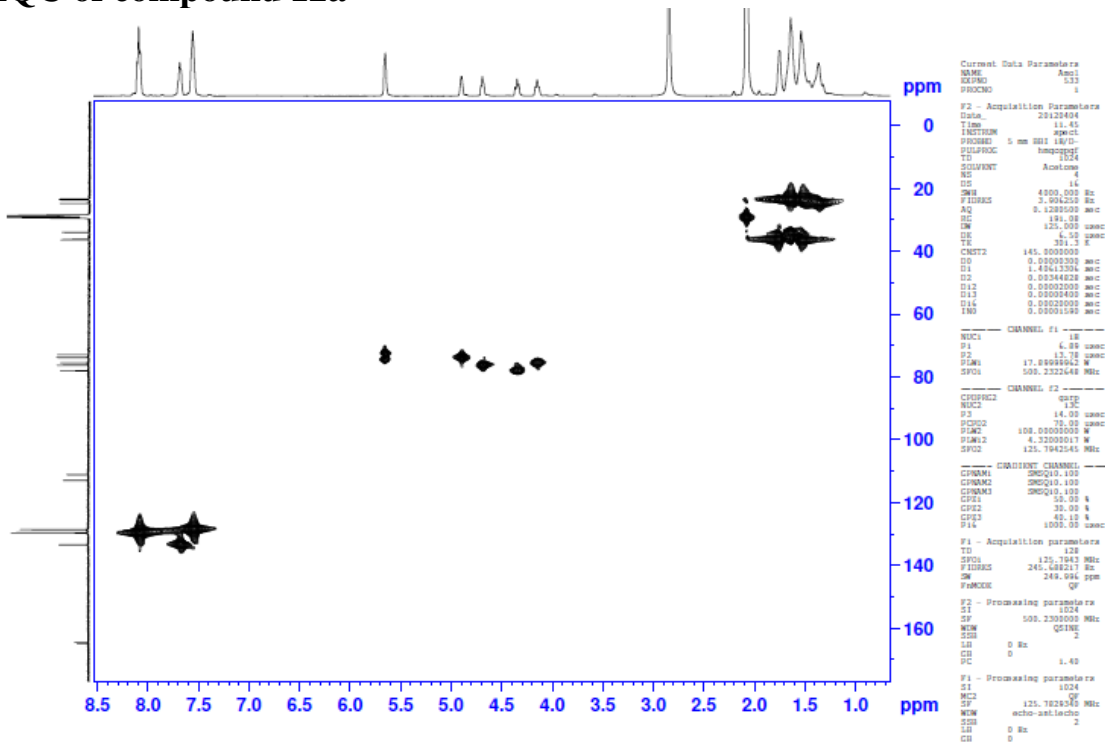

# <sup>1</sup>H NMR of compound 13c

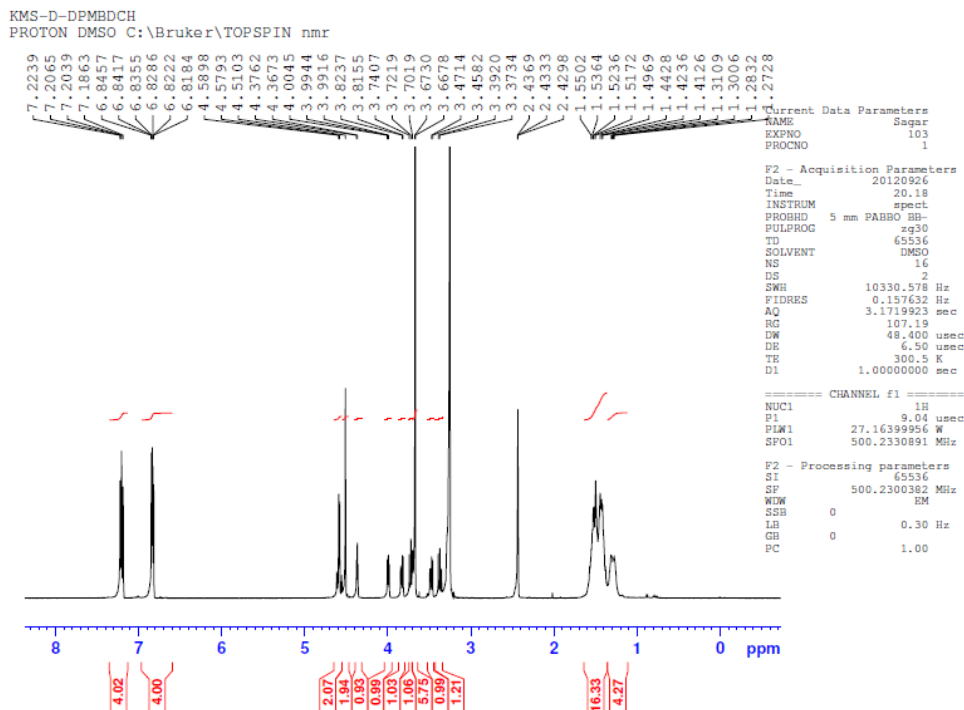

# <sup>1</sup>H NMR of compound 13c

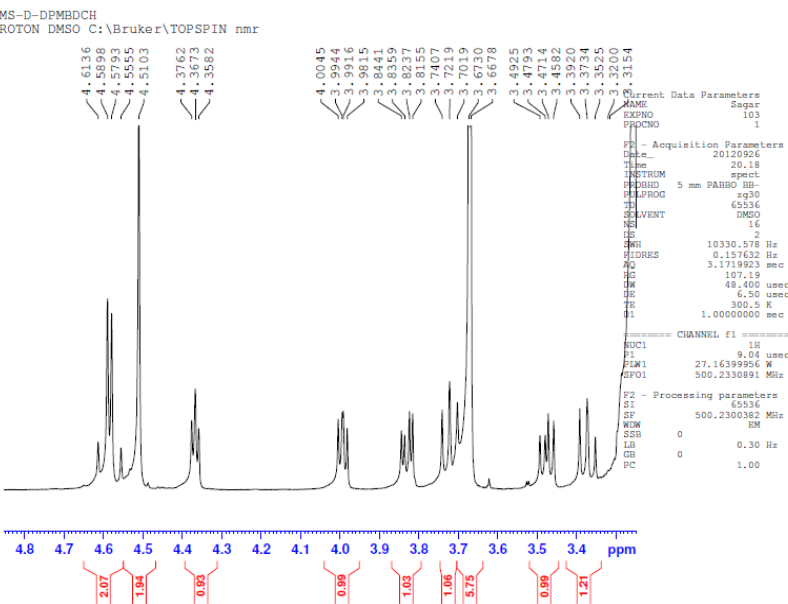

# <sup>13</sup>C NMR of compound 13c

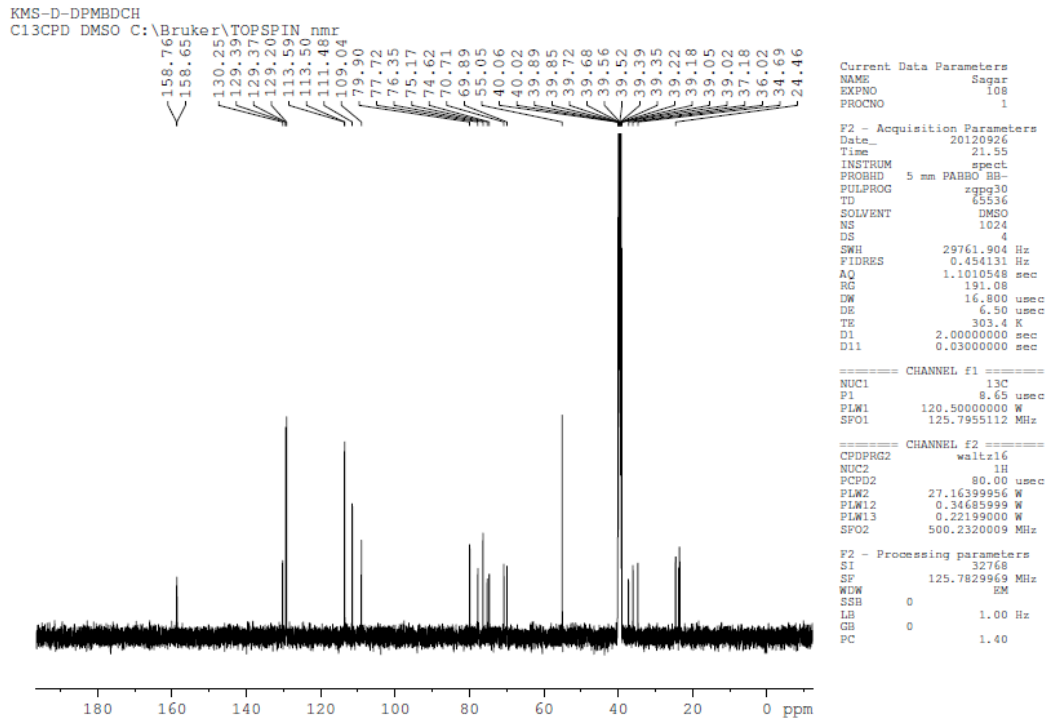

COSY of compound 13c

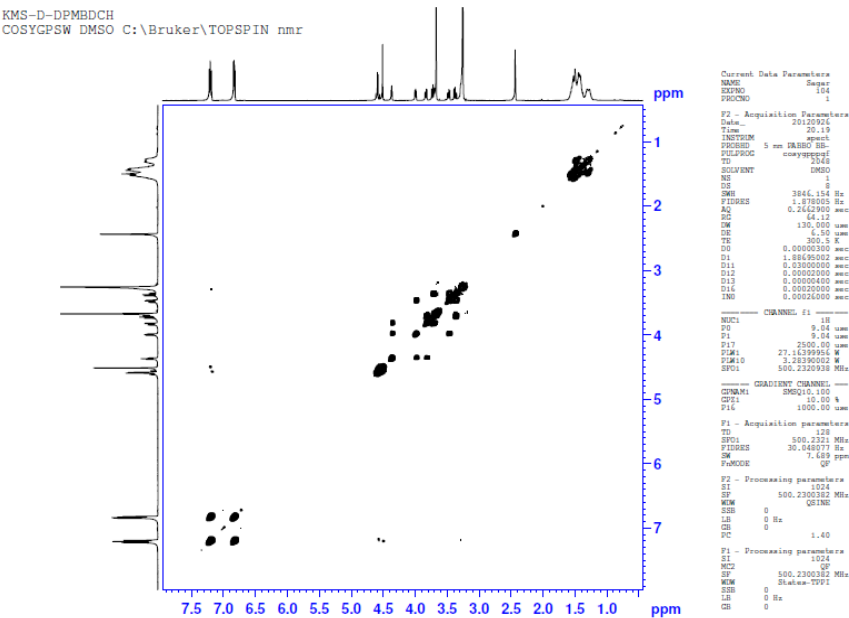



COSY of compound 13c (zoom)

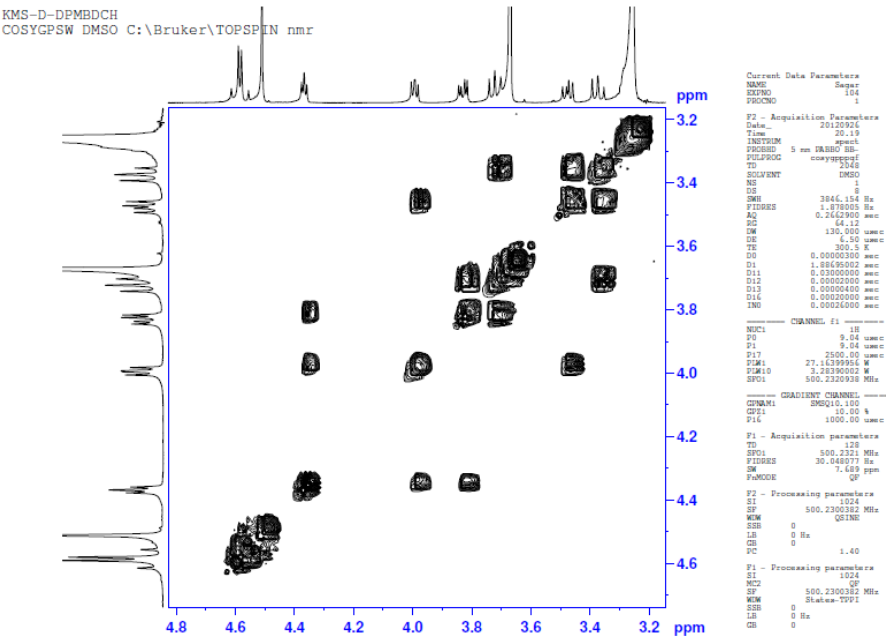

DEPT 135 of compound 13c

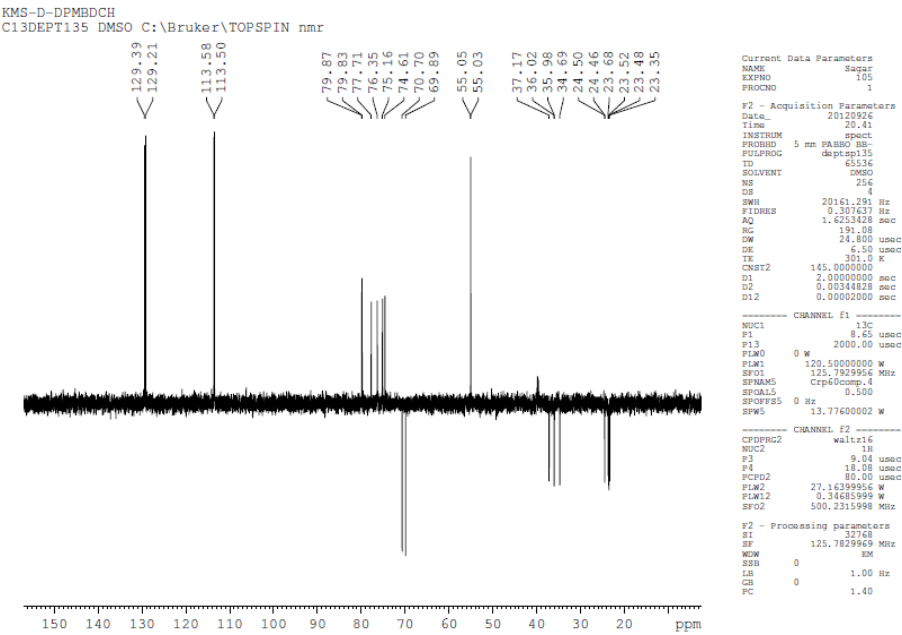

HMQC of compound 13c

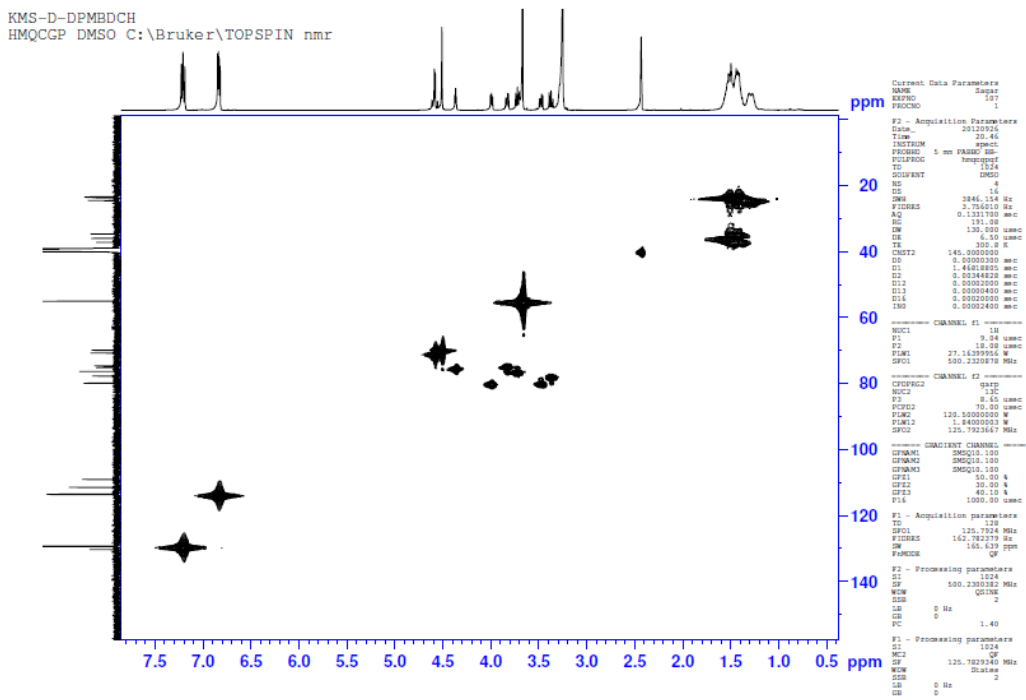

<sup>1</sup>H NMR of compound 16c

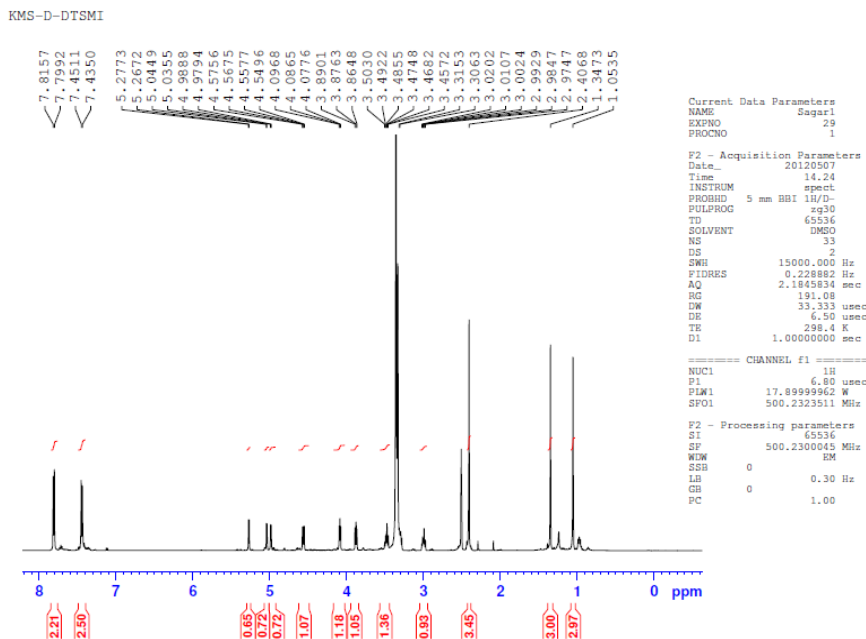

# <sup>1</sup>H NMR of compound 16c (zoom)

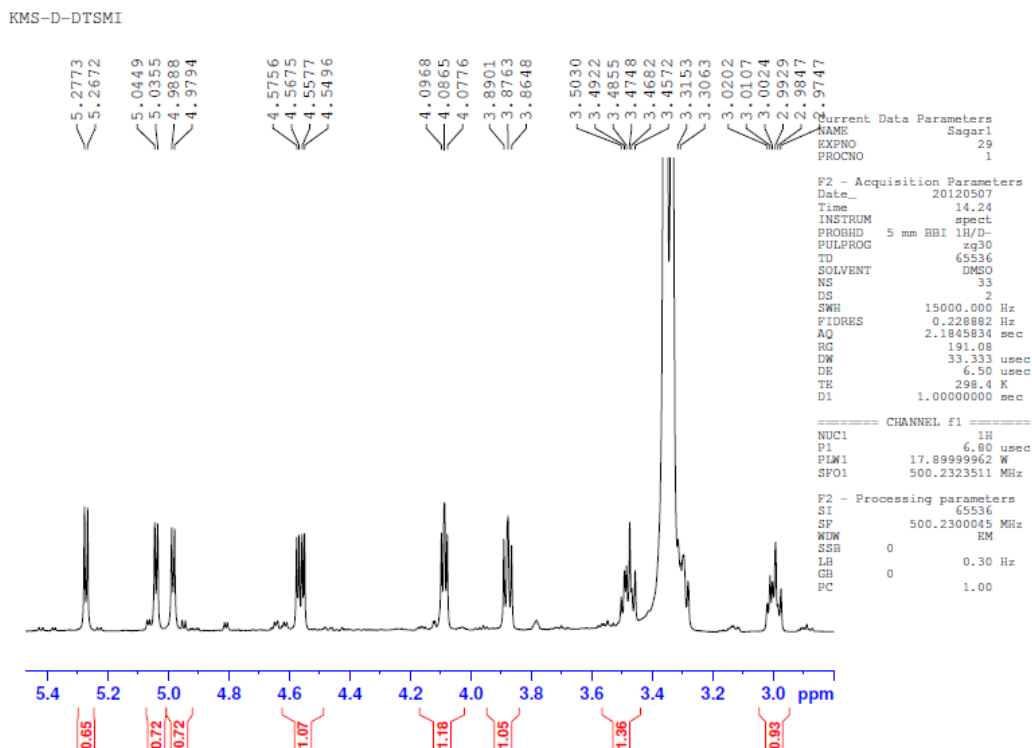

# <sup>13</sup>C NMR of compound 16c

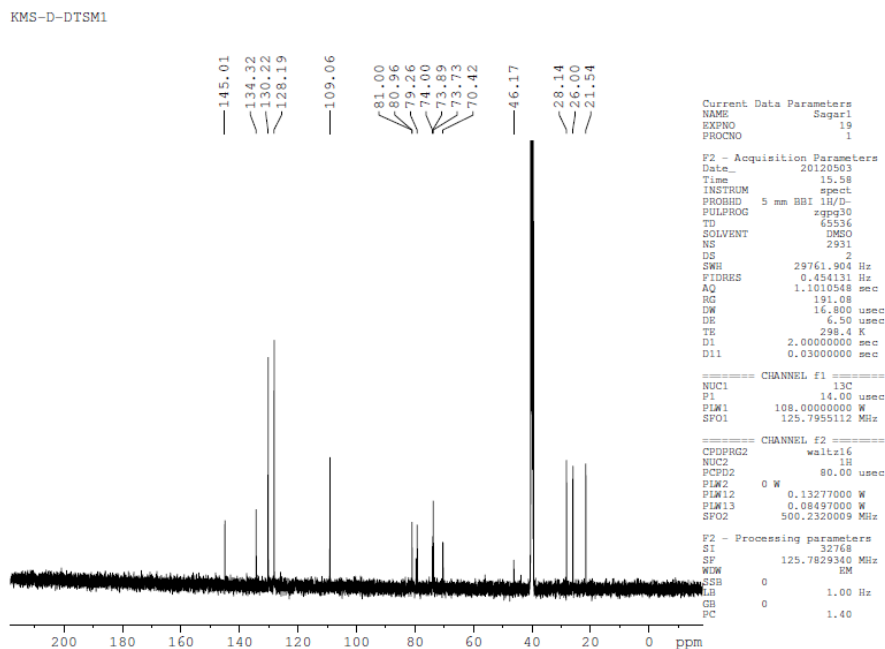

COSY of compound 16c

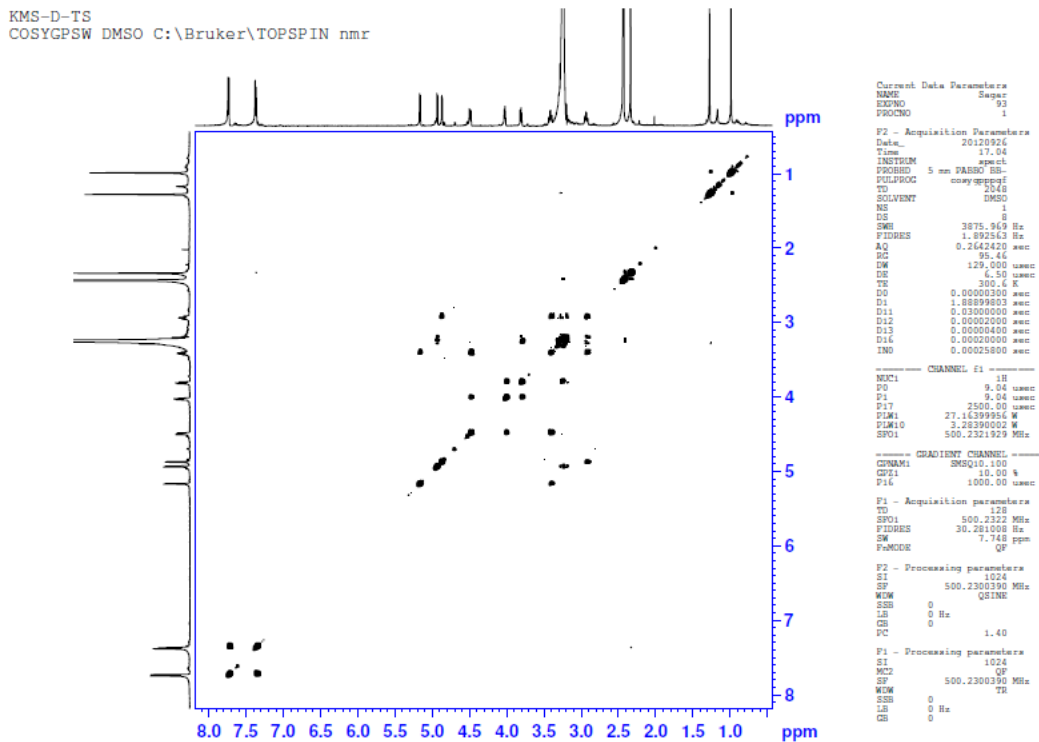

COSY of compound 16c (zoom)

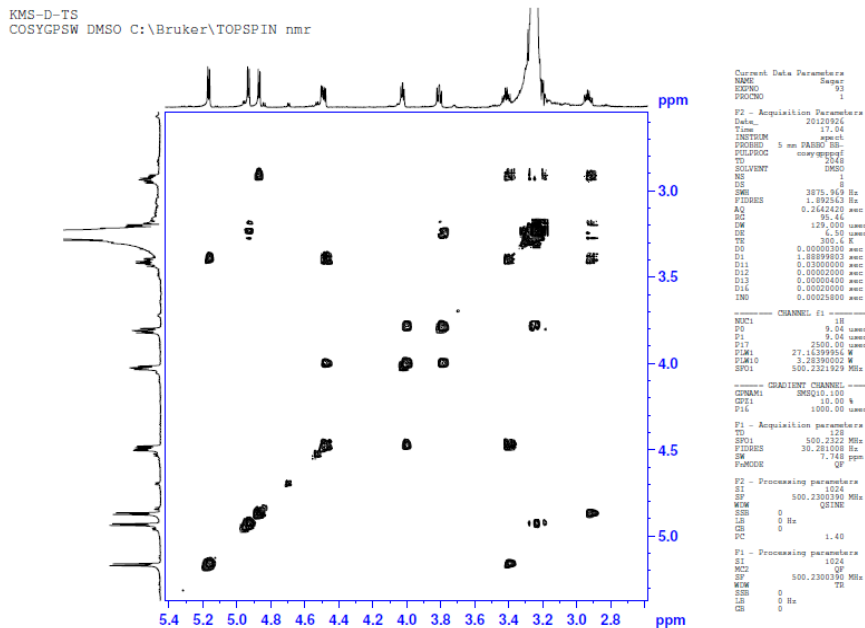



HMQC of Compound 16c

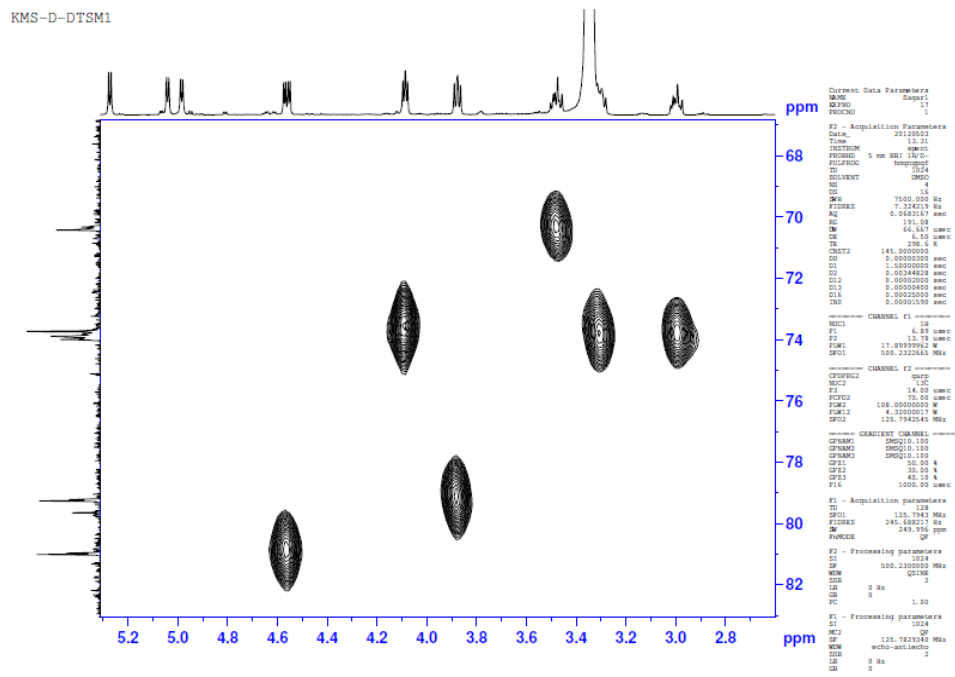

<sup>1</sup>H NMR of compound 21a

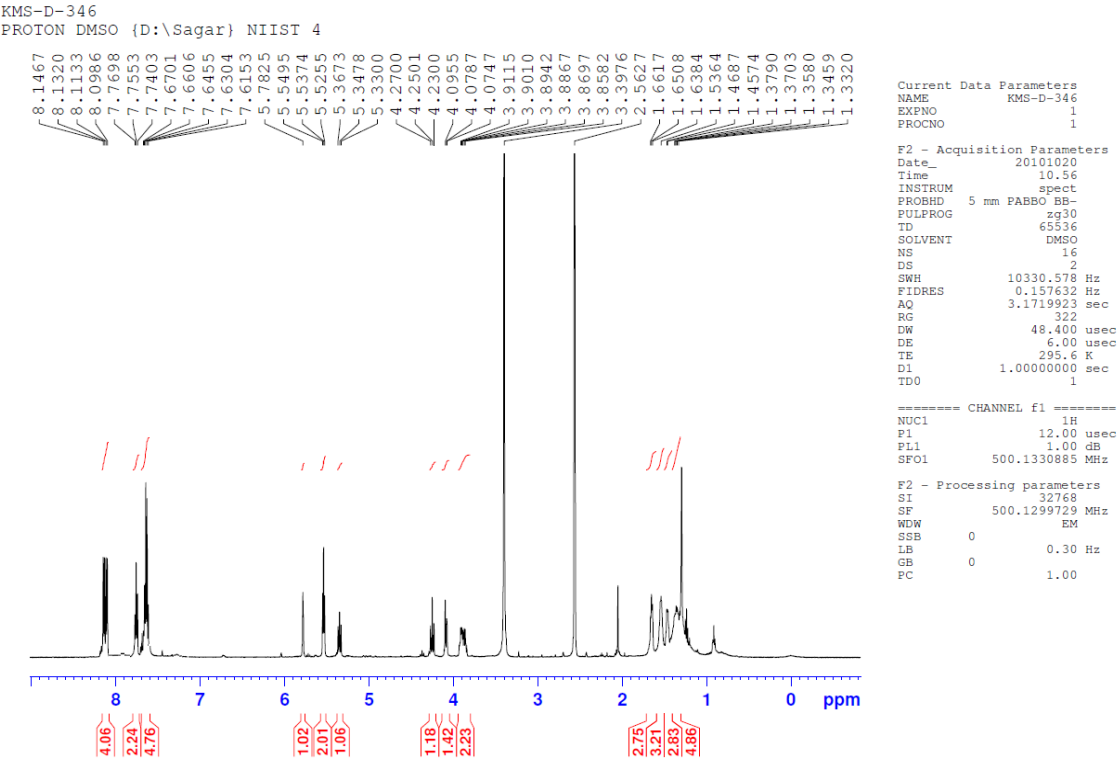

COSY of compound 21a

KMS-D-346  
COSYGPSW DMSO {D:\Sagar} NIIST 52

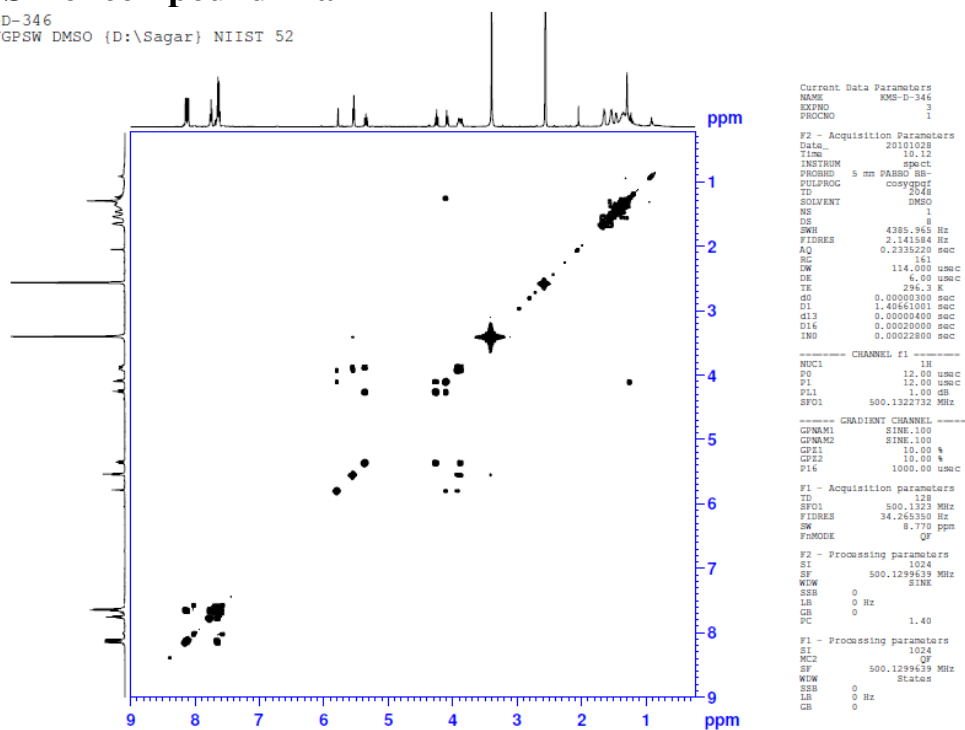

COSY of comound 21a (ZOOM)

KMS-D-346  
COSYGPSW DMSO {D:\Sagar} NIIST 52

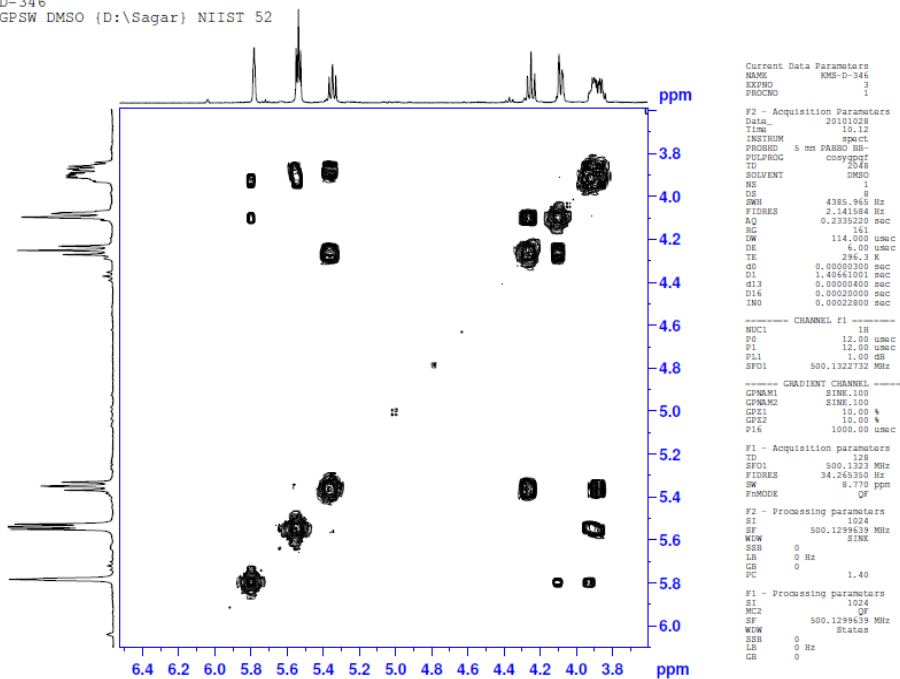

# <sup>13</sup>C NMR of compound 21a

KMS-D-346-I  
C13CPD DMSO {D:\Sagar} NIIST 14

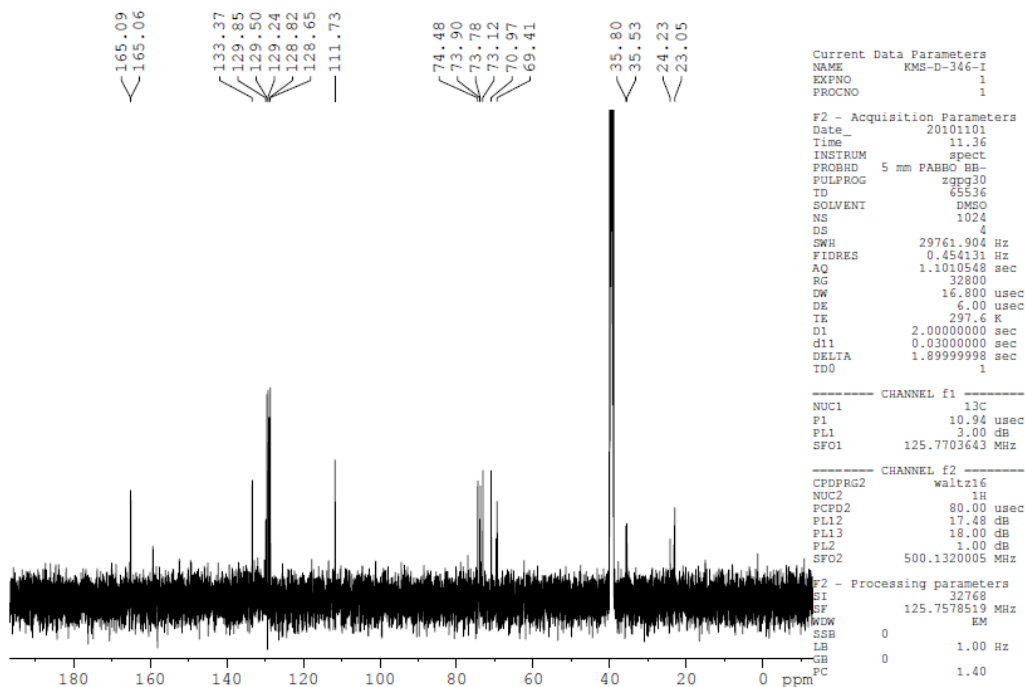

# <sup>1</sup>H NMR of compound 22b

KMS-D-DMMC  
PROTON DMSO C:\Bruker\TOPSPIN nmr

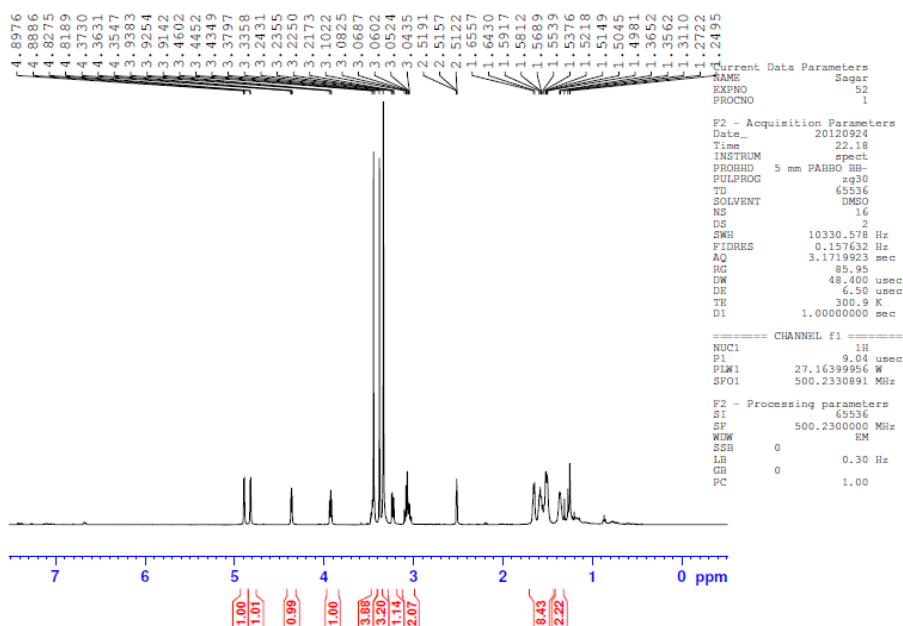



## <sup>1</sup>H NMR of compound 22b (zoom)

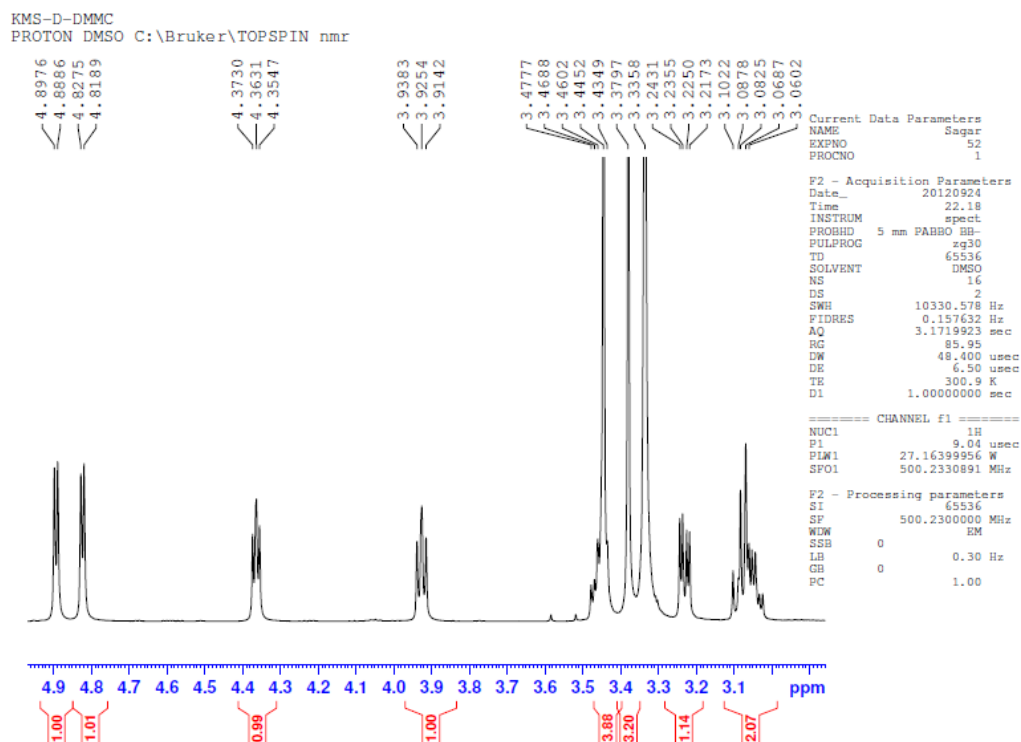

## <sup>13</sup>C NMR of compound 22b

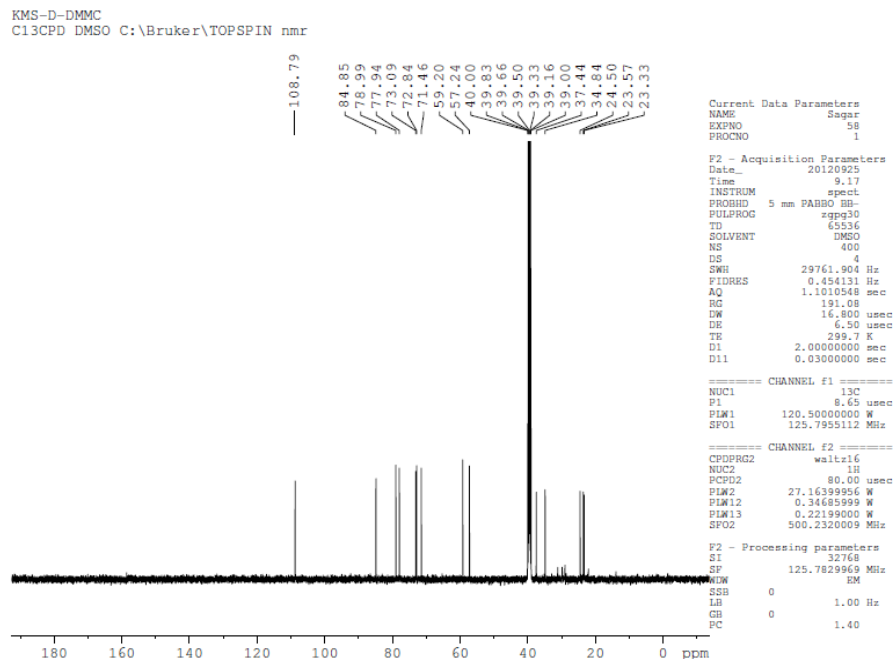

## COSY of compound 22b

KMS-D-DMMC  
COSYGPWS DMSO C:\Bruker\TOPSPIN nmr

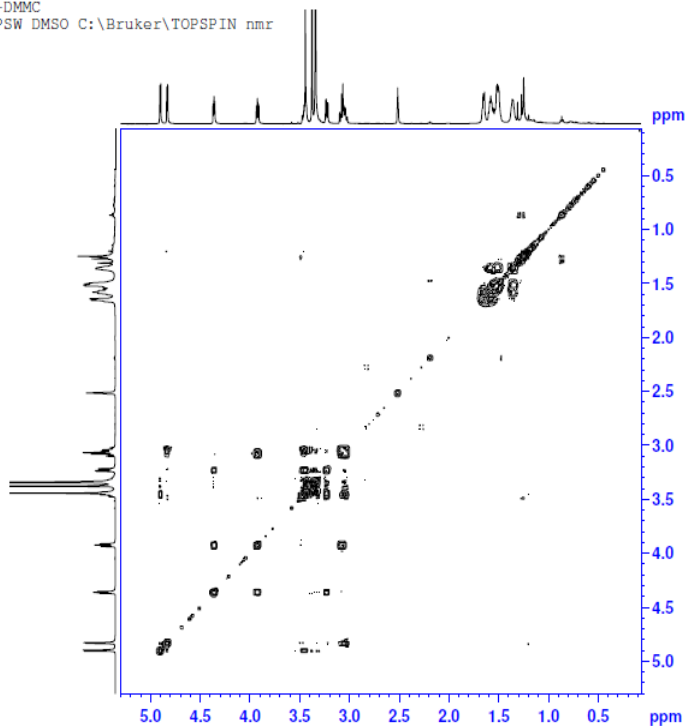

Current Data Parameters  
NAME Sugar  
EXPNO 1  
PROCNO 1

F2 - Acquisition Parameters  
Date\_ 20120925  
Time 9.42  
INSTRUM spect  
PROBHD 5 mm PABBO BB-  
PULPROG cosyseg  
TD 65536  
SOLVENT DMSO  
NS 1  
DS 8  
SWH 2617.861 Hz  
FIDRES 1.278223 Hz  
AQ 0.3912180 sec  
RG 50.7  
DM 191.000 usec  
DE 6.50 usec  
TE 299.2 K  
D0 0.0000000 sec  
D1 1.76202202 sec  
D11 0.03000000 sec  
D12 0.00000000 sec  
D13 0.00000000 sec  
D14 0.00000000 sec  
D15 0.00000000 sec  
D16 0.00000000 sec  
D17 0.00000000 sec  
D18 0.00000000 sec  
D19 0.00000000 sec  
D20 0.00000000 sec  
D21 0.00000000 sec  
D22 0.00000000 sec  
D23 0.00000000 sec  
D24 0.00000000 sec  
D25 0.00000000 sec  
D26 0.00000000 sec  
D27 0.00000000 sec  
D28 0.00000000 sec  
D29 0.00000000 sec  
D30 0.00000000 sec  
D31 0.00000000 sec  
D32 0.00000000 sec  
D33 0.00000000 sec  
D34 0.00000000 sec  
D35 0.00000000 sec  
D36 0.00000000 sec  
D37 0.00000000 sec  
D38 0.00000000 sec  
D39 0.00000000 sec  
D40 0.00000000 sec  
D41 0.00000000 sec  
D42 0.00000000 sec  
D43 0.00000000 sec  
D44 0.00000000 sec  
D45 0.00000000 sec  
D46 0.00000000 sec  
D47 0.00000000 sec  
D48 0.00000000 sec  
D49 0.00000000 sec  
D50 0.00000000 sec  
D51 0.00000000 sec  
D52 0.00000000 sec  
D53 0.00000000 sec  
D54 0.00000000 sec  
D55 0.00000000 sec  
D56 0.00000000 sec  
D57 0.00000000 sec  
D58 0.00000000 sec  
D59 0.00000000 sec  
D60 0.00000000 sec  
D61 0.00000000 sec  
D62 0.00000000 sec  
D63 0.00000000 sec  
D64 0.00000000 sec  
D65 0.00000000 sec  
D66 0.00000000 sec  
D67 0.00000000 sec  
D68 0.00000000 sec  
D69 0.00000000 sec  
D70 0.00000000 sec  
D71 0.00000000 sec  
D72 0.00000000 sec  
D73 0.00000000 sec  
D74 0.00000000 sec  
D75 0.00000000 sec  
D76 0.00000000 sec  
D77 0.00000000 sec  
D78 0.00000000 sec  
D79 0.00000000 sec  
D80 0.00000000 sec  
D81 0.00000000 sec  
D82 0.00000000 sec  
D83 0.00000000 sec  
D84 0.00000000 sec  
D85 0.00000000 sec  
D86 0.00000000 sec  
D87 0.00000000 sec  
D88 0.00000000 sec  
D89 0.00000000 sec  
D90 0.00000000 sec  
D91 0.00000000 sec  
D92 0.00000000 sec  
D93 0.00000000 sec  
D94 0.00000000 sec  
D95 0.00000000 sec  
D96 0.00000000 sec  
D97 0.00000000 sec  
D98 0.00000000 sec  
D99 0.00000000 sec  
D100 0.00000000 sec

## DEPT 135 of compound 22b

KMS-D-DMMC  
C13DEPT135 DMSO C:\Bruker\TOPSPIN nmr

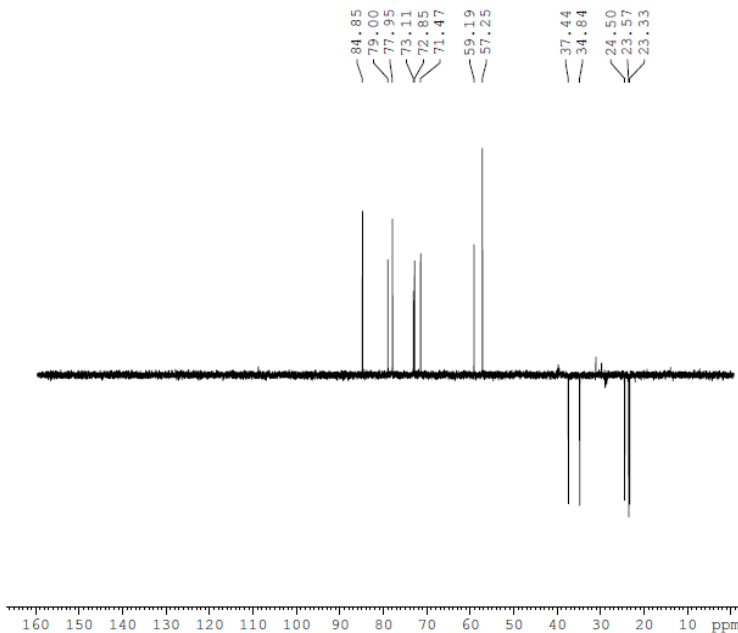

Current Data Parameters  
NAME Sugar  
EXPNO 57  
PROCNO 1

F2 - Acquisition Parameters  
Date\_ 20120925  
Time 9.02  
INSTRUM spect  
PROBHD 5 mm PABBO BB-  
PULPROG deptsp135  
TD 65536  
SOLVENT DMSO  
NS 231  
DS 4  
SWH 20161.291 Hz  
FIDRES 0.307637 Hz  
AQ 1.6213428 sec  
RG 191.08  
DM 24.800 usec  
DE 6.50 usec  
TE 300.6 K  
D0 0.0000000 sec  
D1 2.00000000 sec  
D2 0.00344828 sec  
D12 0.00002000 sec

CHANNEL f1  
NUC1 13C  
P1 8.65 usec  
P13 2000.00 usec  
P1W0 0 W  
P1W1 120.50000000 W  
SFO1 125.7829969 MHz  
SFO2 125.7829969 MHz  
SFO3 125.7829969 MHz  
SFO4 125.7829969 MHz  
SFO5 125.7829969 MHz  
SFO6 125.7829969 MHz  
SFO7 125.7829969 MHz  
SFO8 125.7829969 MHz  
SFO9 125.7829969 MHz  
SFO10 125.7829969 MHz  
SFO11 125.7829969 MHz  
SFO12 125.7829969 MHz  
SFO13 125.7829969 MHz  
SFO14 125.7829969 MHz  
SFO15 125.7829969 MHz  
SFO16 125.7829969 MHz  
SFO17 125.7829969 MHz  
SFO18 125.7829969 MHz  
SFO19 125.7829969 MHz  
SFO20 125.7829969 MHz  
SFO21 125.7829969 MHz  
SFO22 125.7829969 MHz  
SFO23 125.7829969 MHz  
SFO24 125.7829969 MHz  
SFO25 125.7829969 MHz  
SFO26 125.7829969 MHz  
SFO27 125.7829969 MHz  
SFO28 125.7829969 MHz  
SFO29 125.7829969 MHz  
SFO30 125.7829969 MHz  
SFO31 125.7829969 MHz  
SFO32 125.7829969 MHz  
SFO33 125.7829969 MHz  
SFO34 125.7829969 MHz  
SFO35 125.7829969 MHz  
SFO36 125.7829969 MHz  
SFO37 125.7829969 MHz  
SFO38 125.7829969 MHz  
SFO39 125.7829969 MHz  
SFO40 125.7829969 MHz  
SFO41 125.7829969 MHz  
SFO42 125.7829969 MHz  
SFO43 125.7829969 MHz  
SFO44 125.7829969 MHz  
SFO45 125.7829969 MHz  
SFO46 125.7829969 MHz  
SFO47 125.7829969 MHz  
SFO48 125.7829969 MHz  
SFO49 125.7829969 MHz  
SFO50 125.7829969 MHz  
SFO51 125.7829969 MHz  
SFO52 125.7829969 MHz  
SFO53 125.7829969 MHz  
SFO54 125.7829969 MHz  
SFO55 125.7829969 MHz  
SFO56 125.7829969 MHz  
SFO57 125.7829969 MHz  
SFO58 125.7829969 MHz  
SFO59 125.7829969 MHz  
SFO60 125.7829969 MHz  
SFO61 125.7829969 MHz  
SFO62 125.7829969 MHz  
SFO63 125.7829969 MHz  
SFO64 125.7829969 MHz  
SFO65 125.7829969 MHz  
SFO66 125.7829969 MHz  
SFO67 125.7829969 MHz  
SFO68 125.7829969 MHz  
SFO69 125.7829969 MHz  
SFO70 125.7829969 MHz  
SFO71 125.7829969 MHz  
SFO72 125.7829969 MHz  
SFO73 125.7829969 MHz  
SFO74 125.7829969 MHz  
SFO75 125.7829969 MHz  
SFO76 125.7829969 MHz  
SFO77 125.7829969 MHz  
SFO78 125.7829969 MHz  
SFO79 125.7829969 MHz  
SFO80 125.7829969 MHz  
SFO81 125.7829969 MHz  
SFO82 125.7829969 MHz  
SFO83 125.7829969 MHz  
SFO84 125.7829969 MHz  
SFO85 125.7829969 MHz  
SFO86 125.7829969 MHz  
SFO87 125.7829969 MHz  
SFO88 125.7829969 MHz  
SFO89 125.7829969 MHz  
SFO90 125.7829969 MHz  
SFO91 125.7829969 MHz  
SFO92 125.7829969 MHz  
SFO93 125.7829969 MHz  
SFO94 125.7829969 MHz  
SFO95 125.7829969 MHz  
SFO96 125.7829969 MHz  
SFO97 125.7829969 MHz  
SFO98 125.7829969 MHz  
SFO99 125.7829969 MHz  
SFO100 125.7829969 MHz



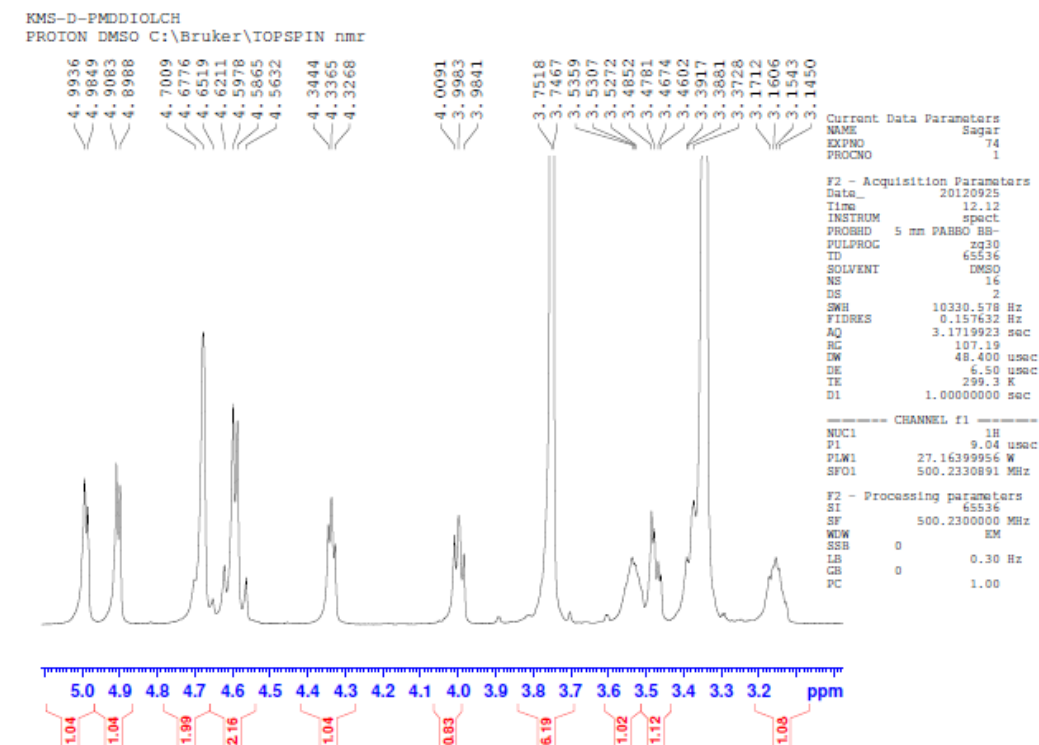

### <sup>13</sup>C NMR of compound 22c

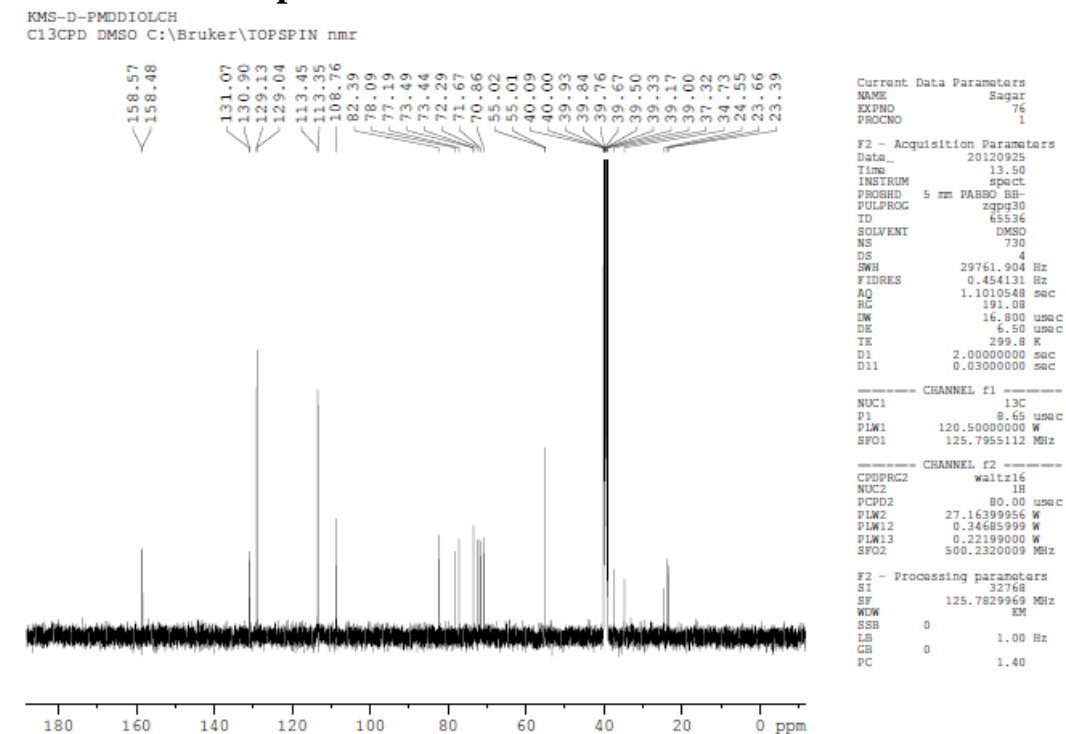

### COSY of compound 22c

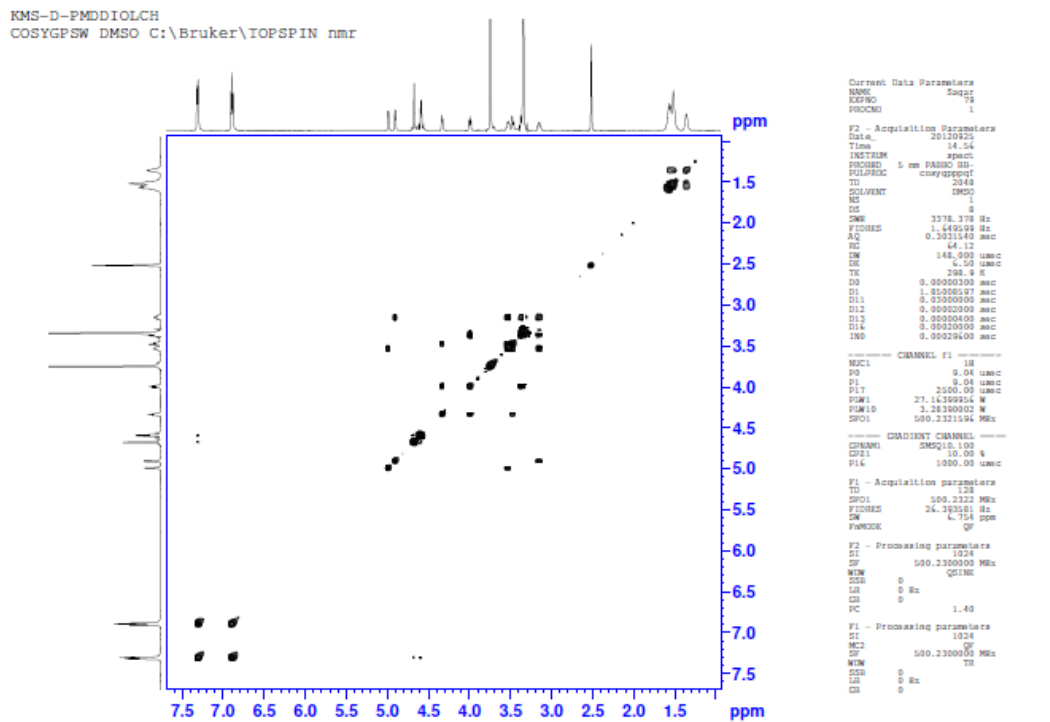

COSY of compound 22c (zoom)

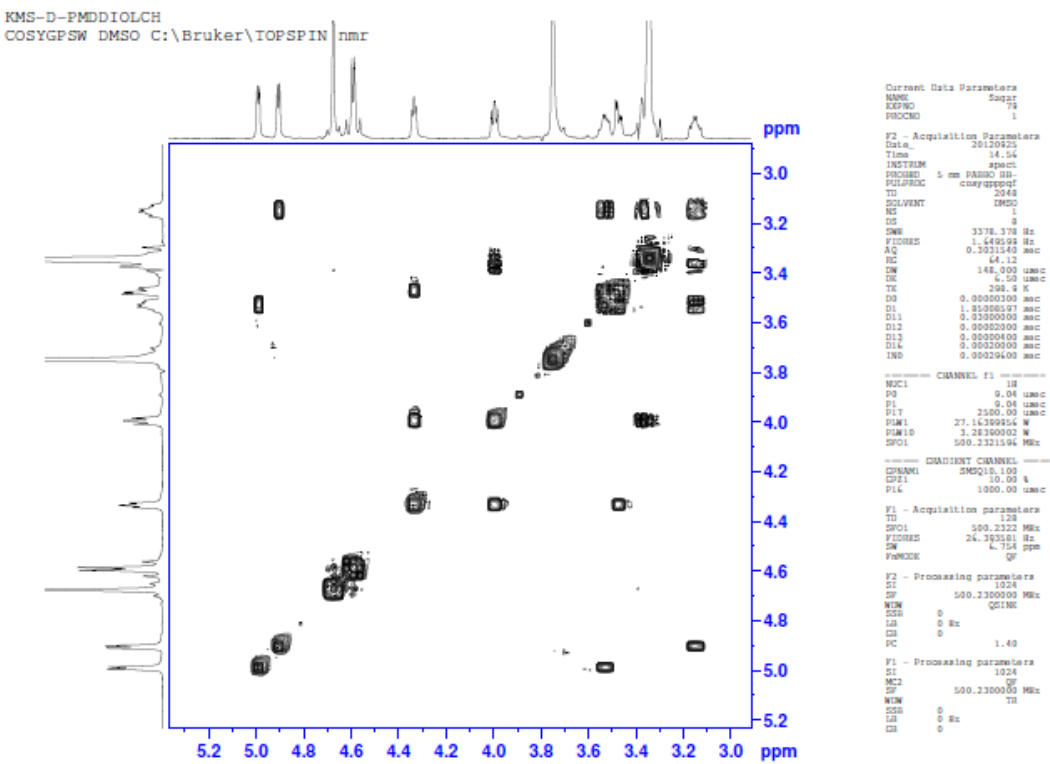

DEPT135 of compound 22c

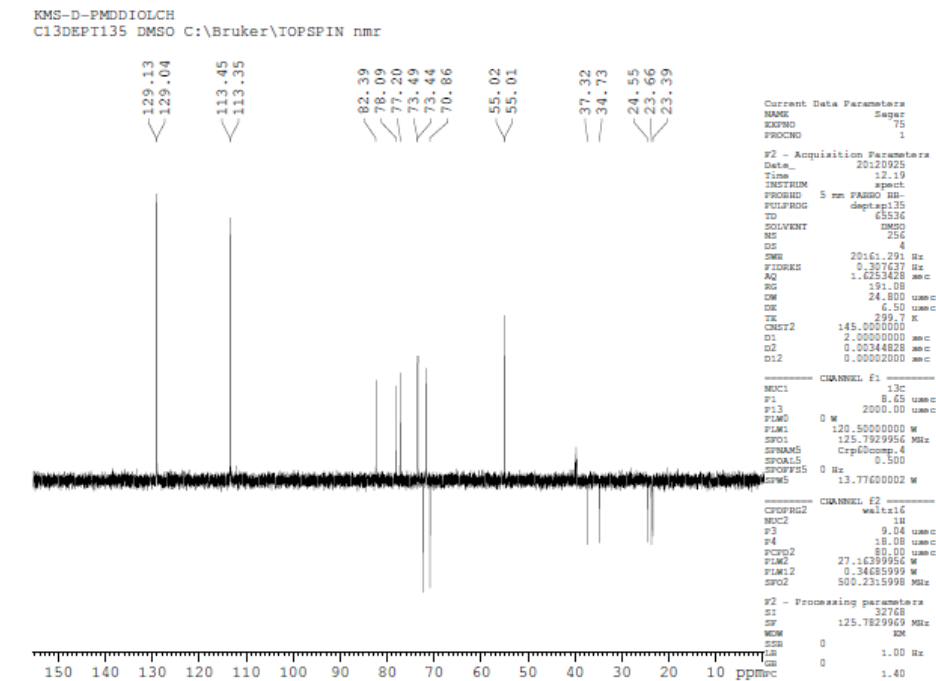

HMQC of compound 22c

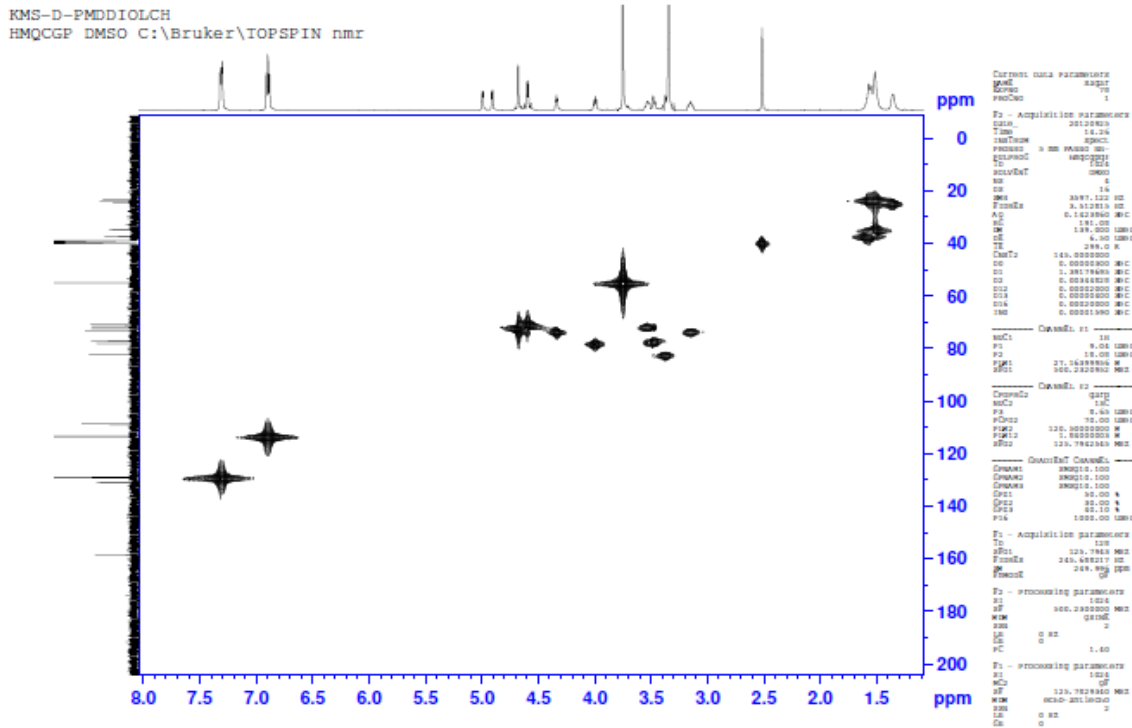

# <sup>1</sup>H NMR of compound 23b

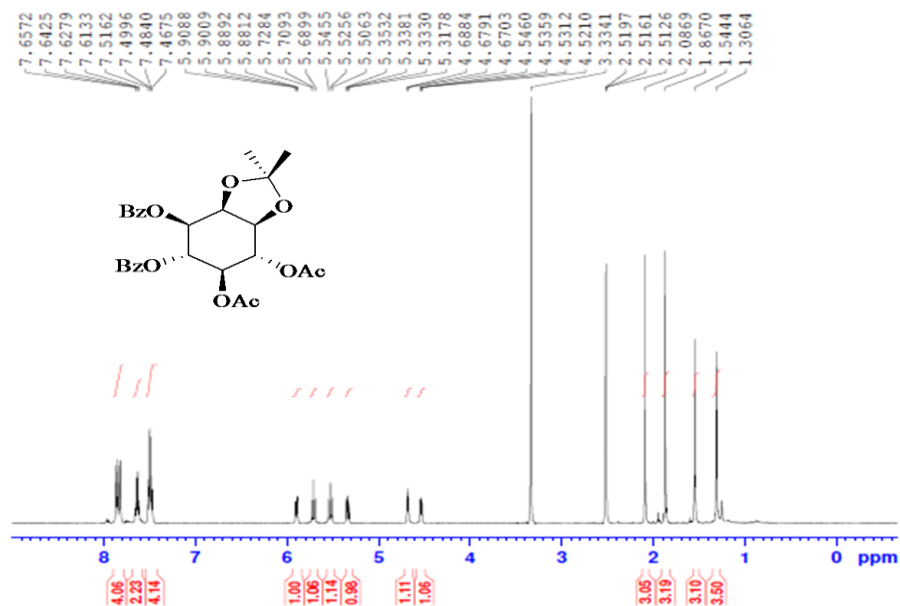

# COSY of compound 23b

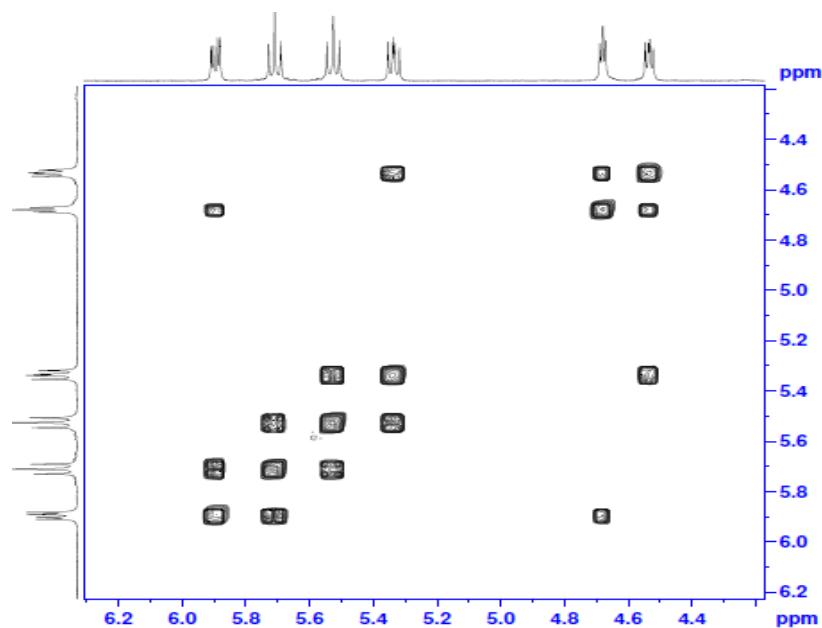

### $^{13}\text{C}$ NMR of compound 23b

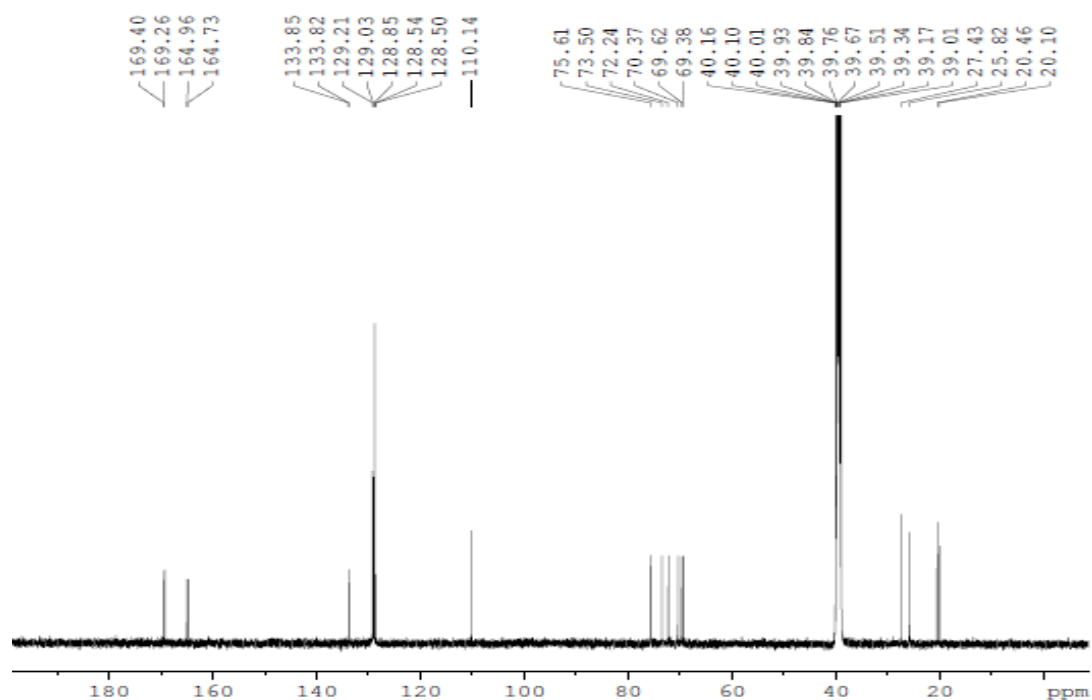

### DEPT-135 of compound 23b

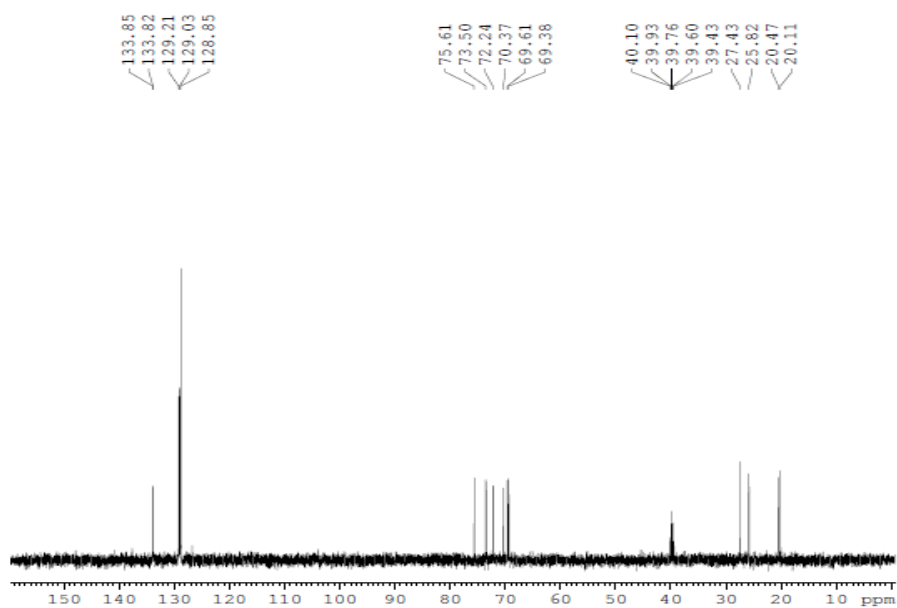



## HMQC of compound 23b

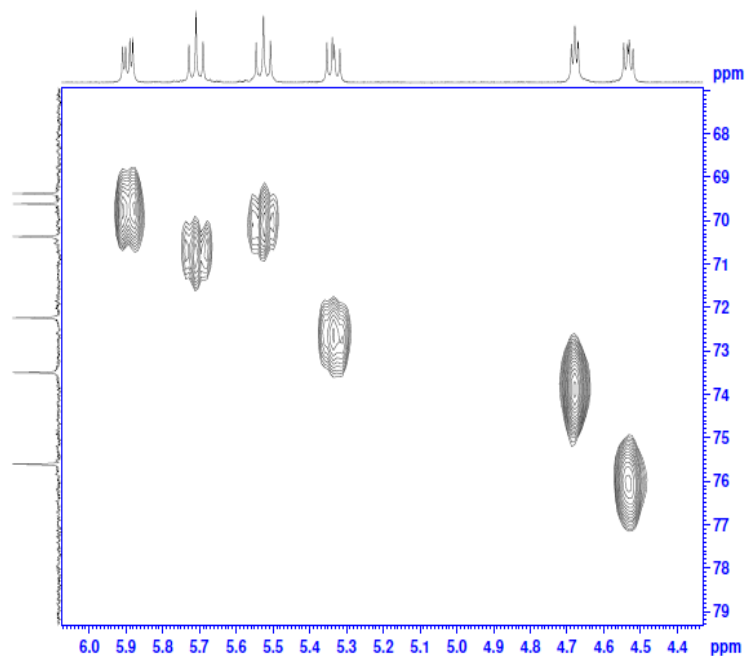

## <sup>1</sup>H NMR of compound 24b

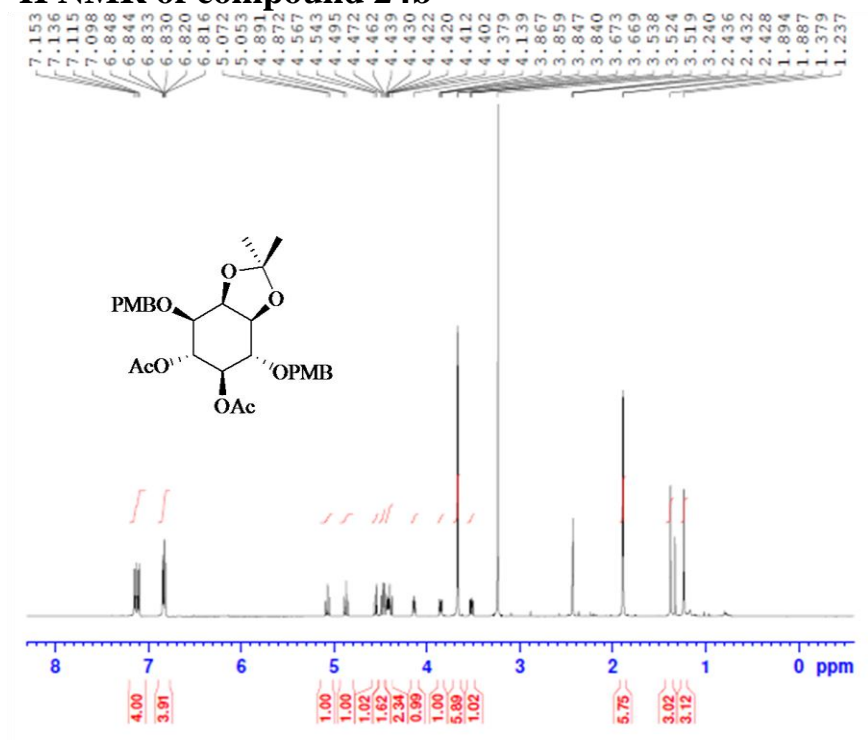

# **<sup>1</sup>H NMR of compound 24b (zoom)**

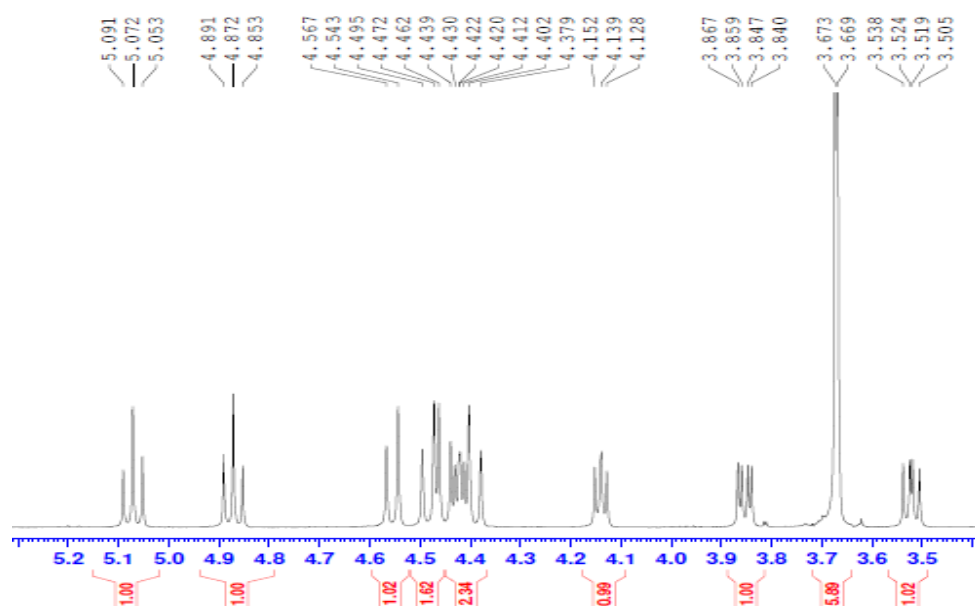

## **COSY of compound 24b**

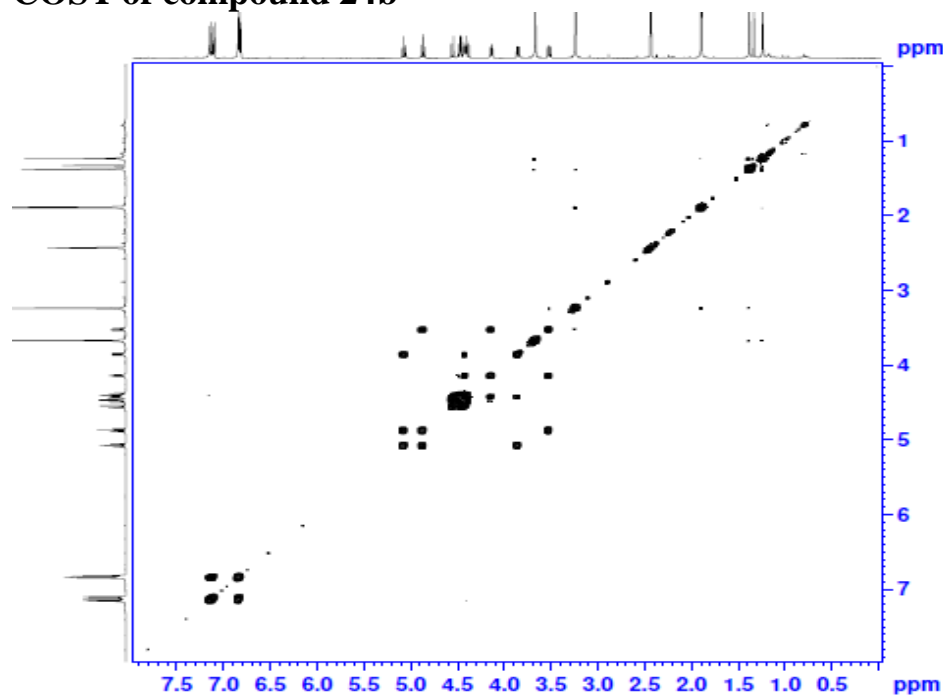

# <sup>13</sup>C NMR of compound 24b

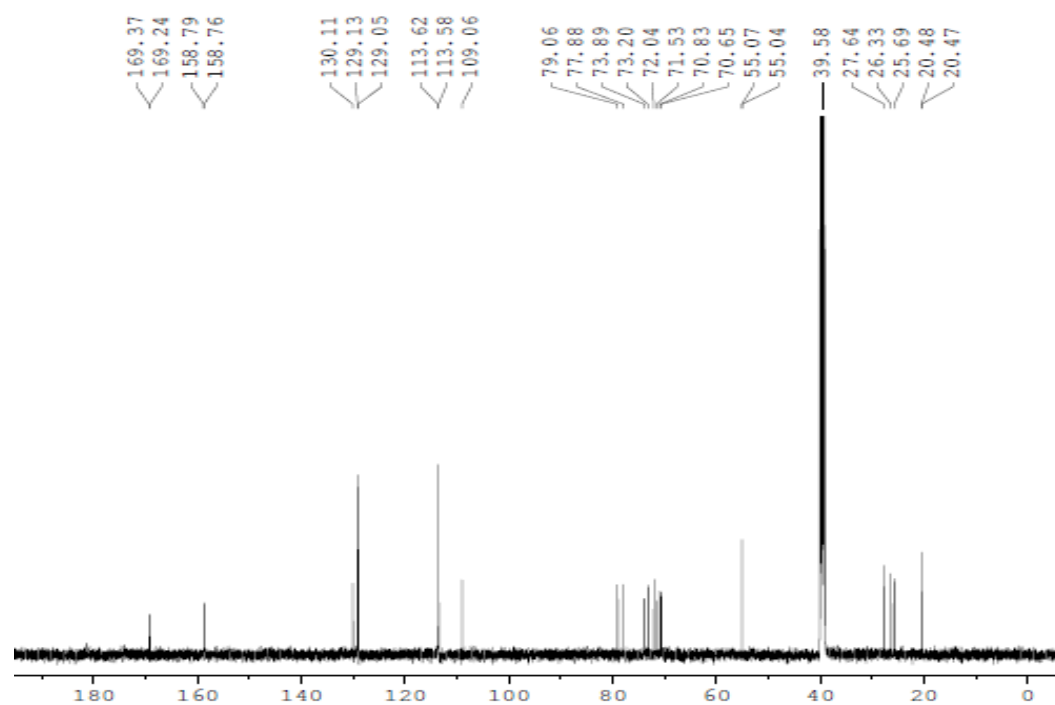

## DEPT-135 of compound 24b

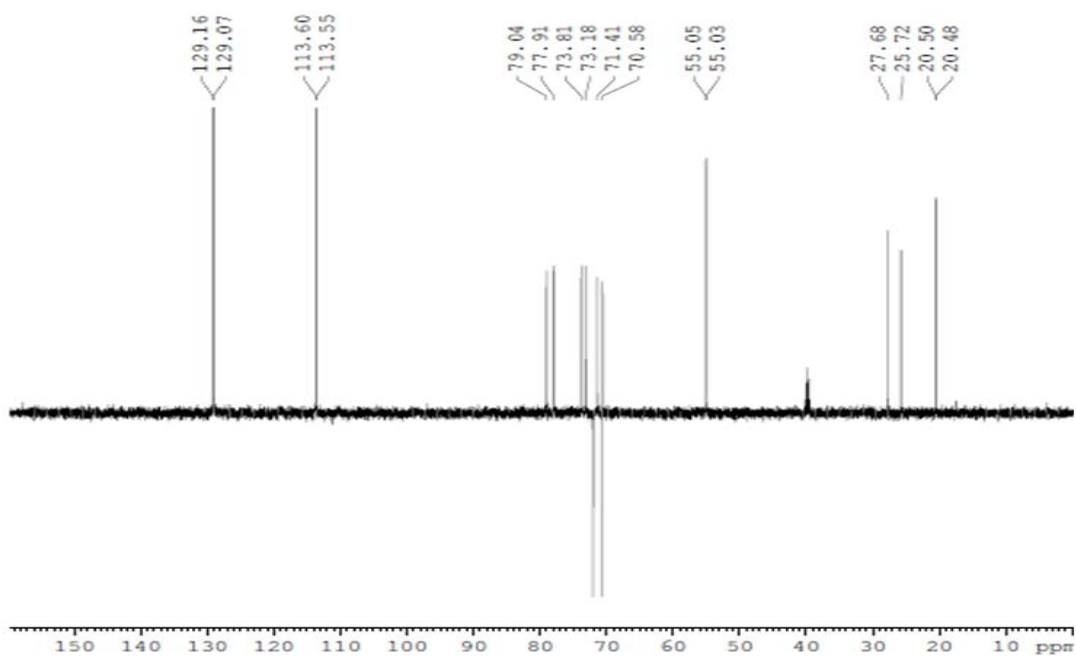

## HMQC of compound 24b

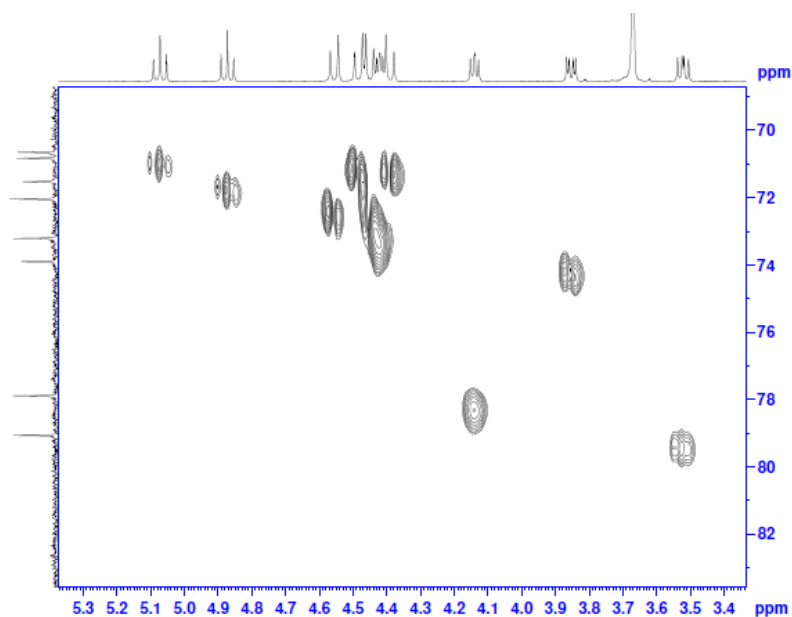

## <sup>1</sup>H NMR of compound 26a

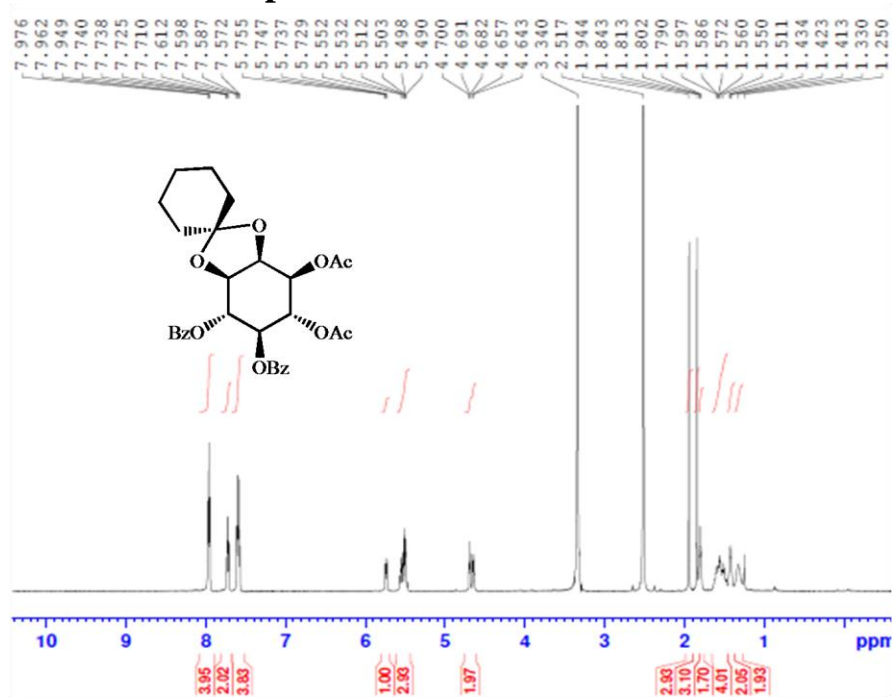

# **<sup>1</sup>H NMR of compound 26a (zoom)**

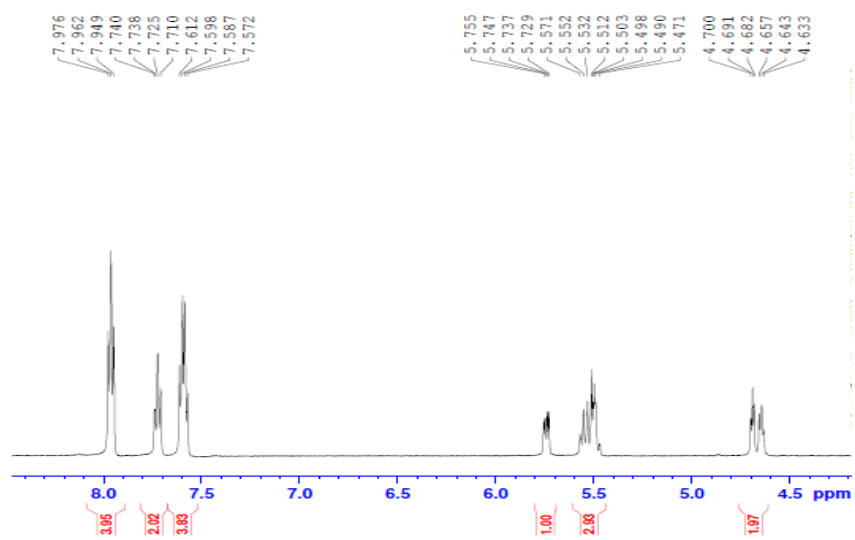

## **COSY of compound 26a**

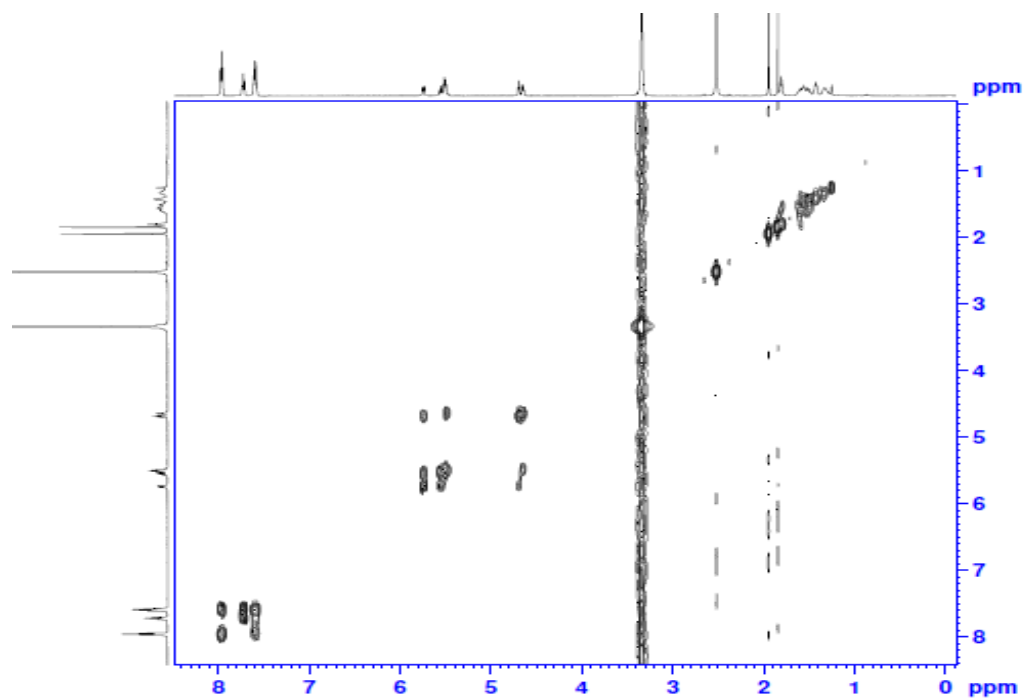

# **$^{13}\text{C}$ NMR of compound 26a**

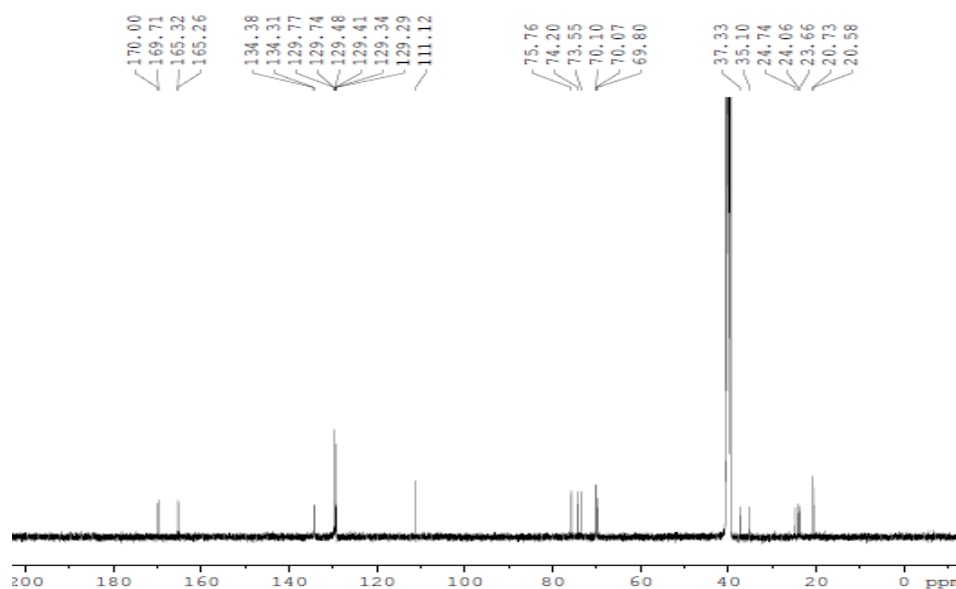

## **DEPT-135 of compound 26a**

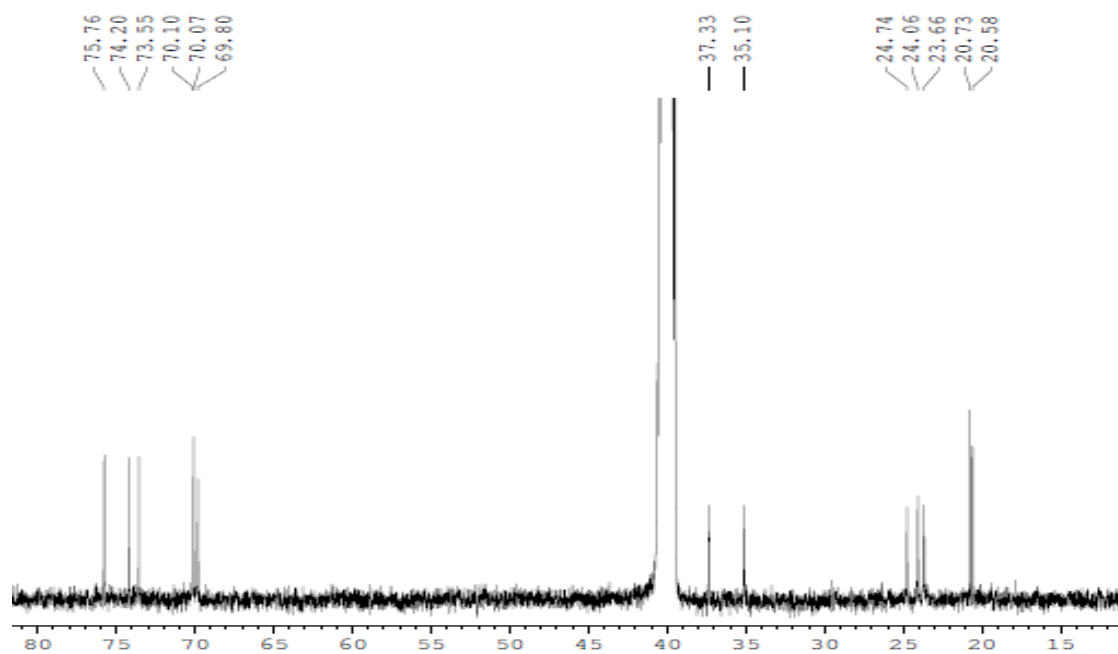

## HMQC of compound 26a

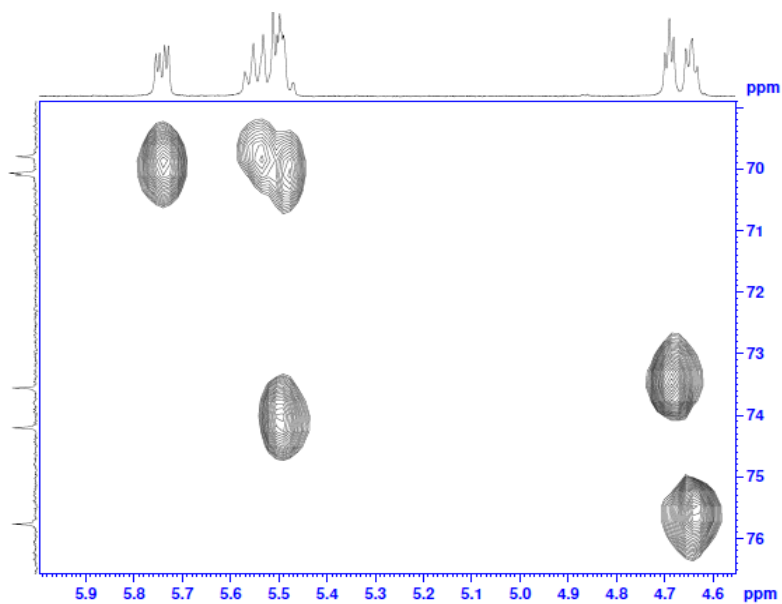

## <sup>1</sup>H NMR of compound 27a

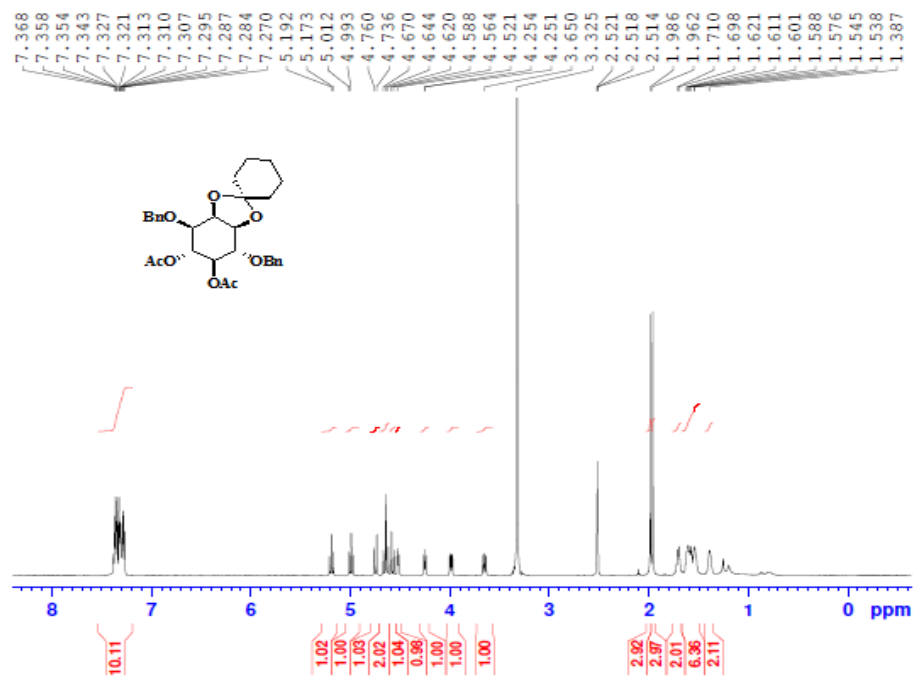

## <sup>1</sup>H NMR of compound 27a(zoom)

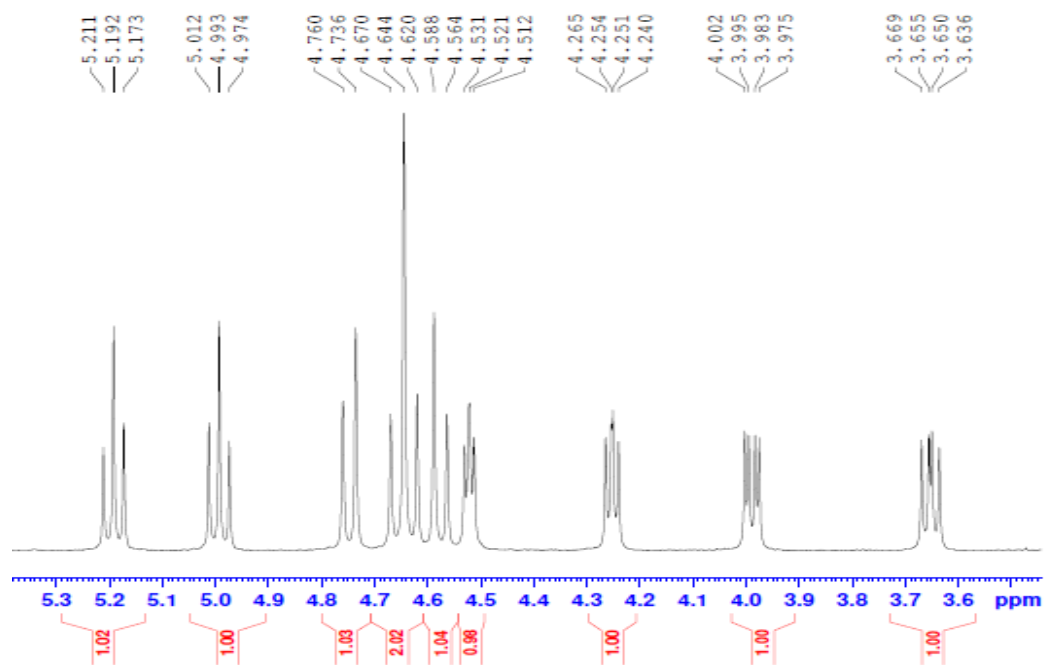

### COSY of compound 27a

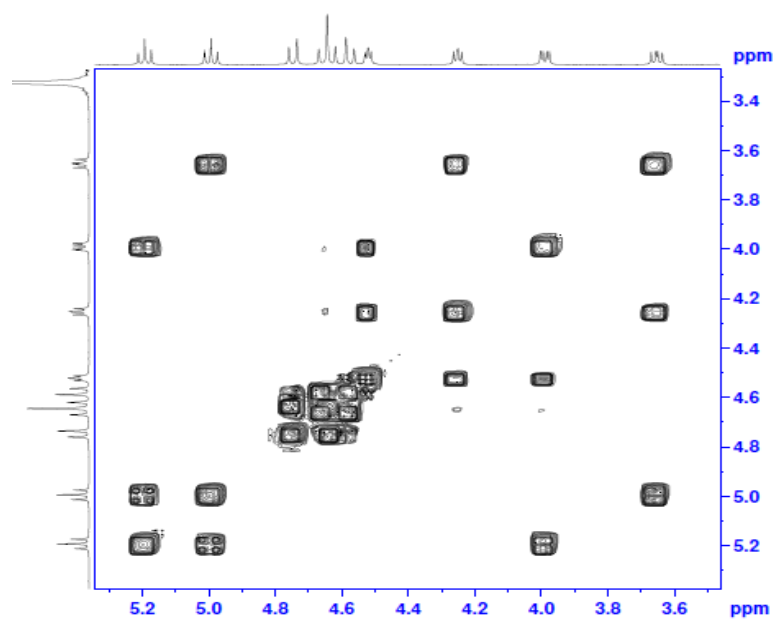

### <sup>13</sup>C NMR of compound 27a



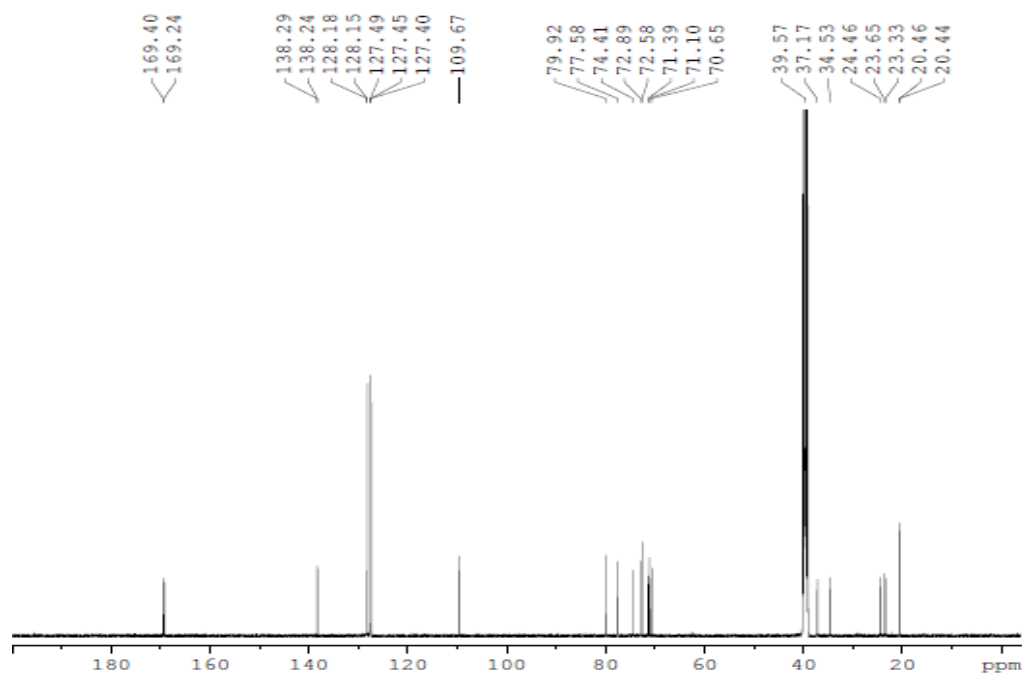

### DEPT-135 of compound 27a

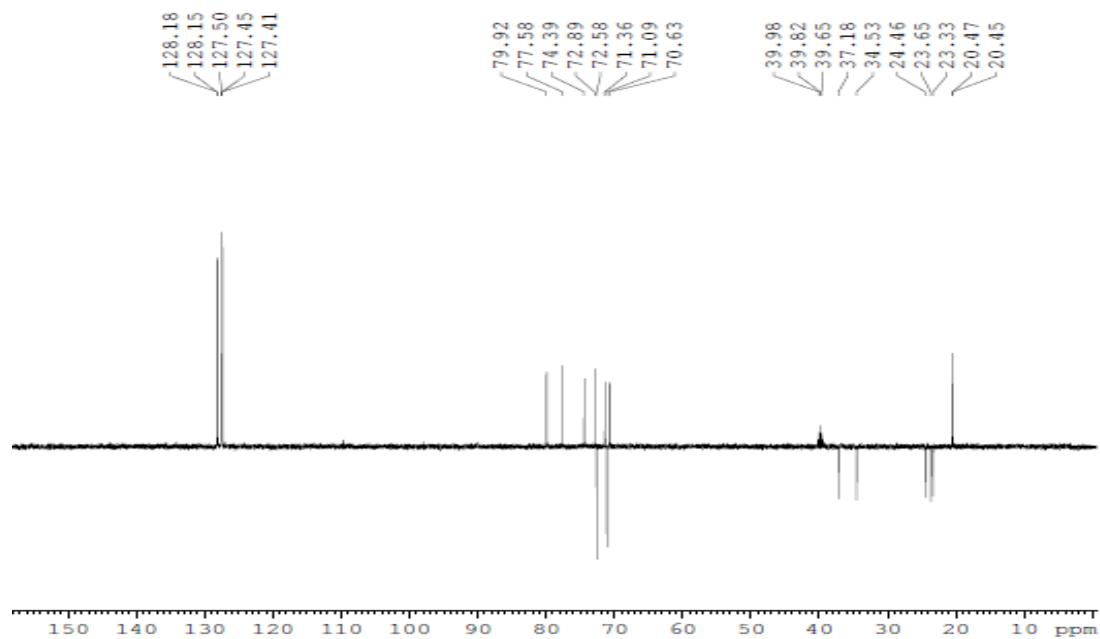

## HMQC of compound 27a

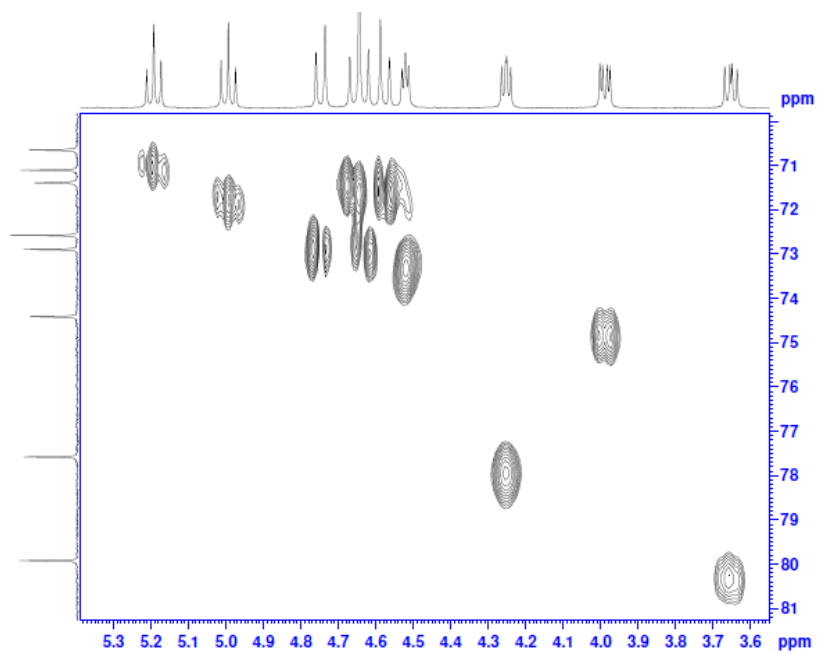

## <sup>1</sup>H NMR of compound 27b

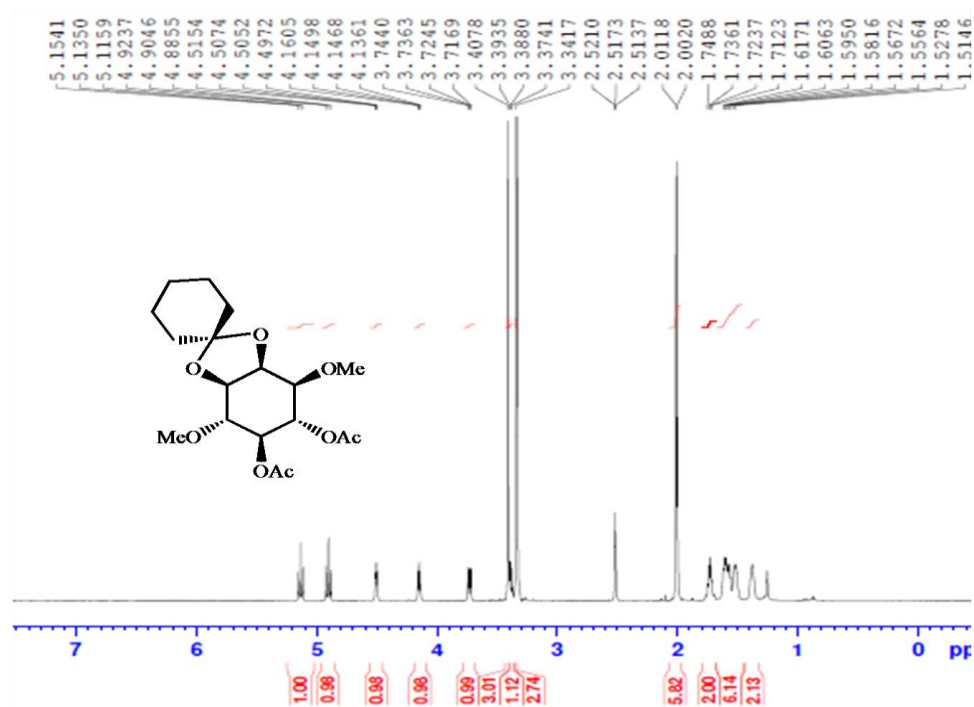

### $^1\text{H}$ NMR of compound 27b (zoom)

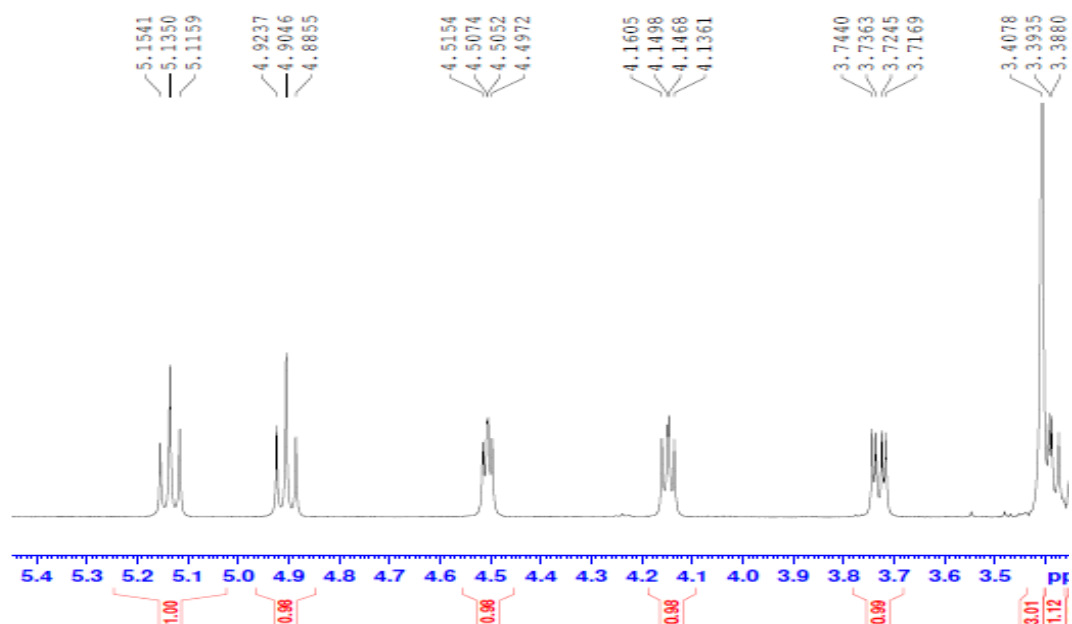

### COSY of compound 27b

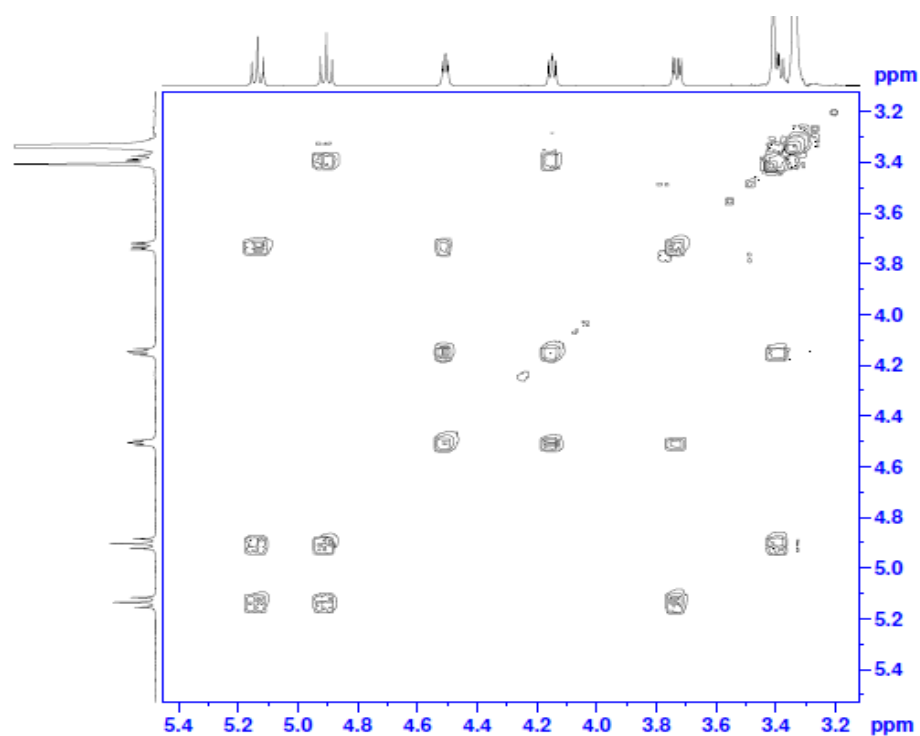

# <sup>13</sup>C NMR of compound 27b

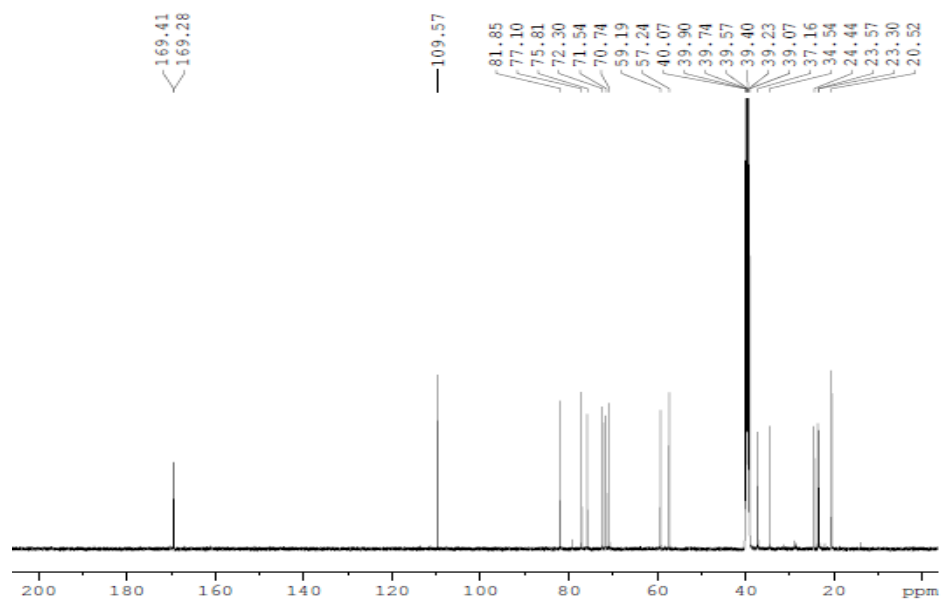

## DEPT-135 of compound 27b

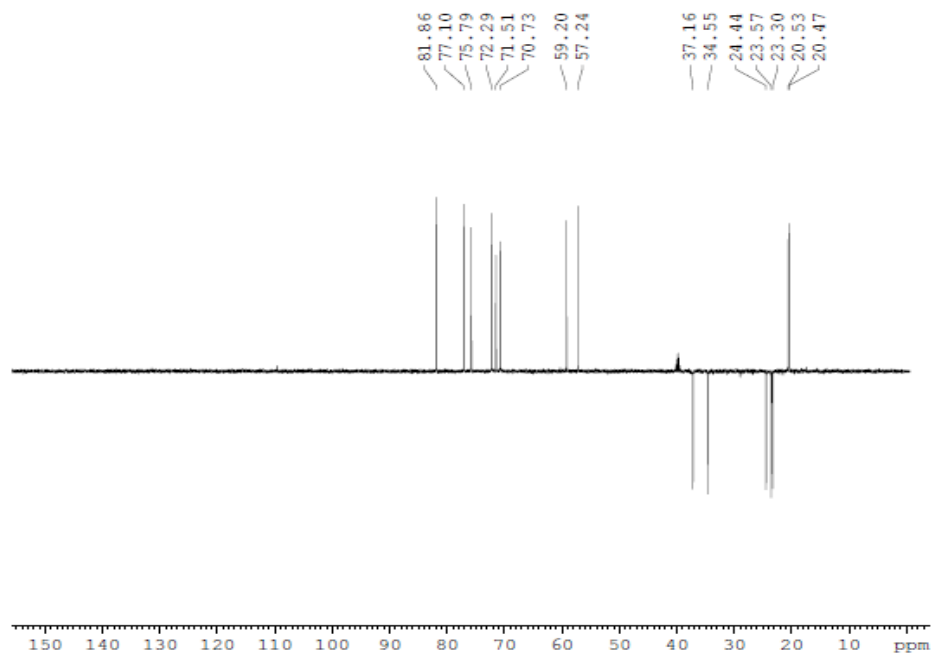

## HMQC of compound 27b

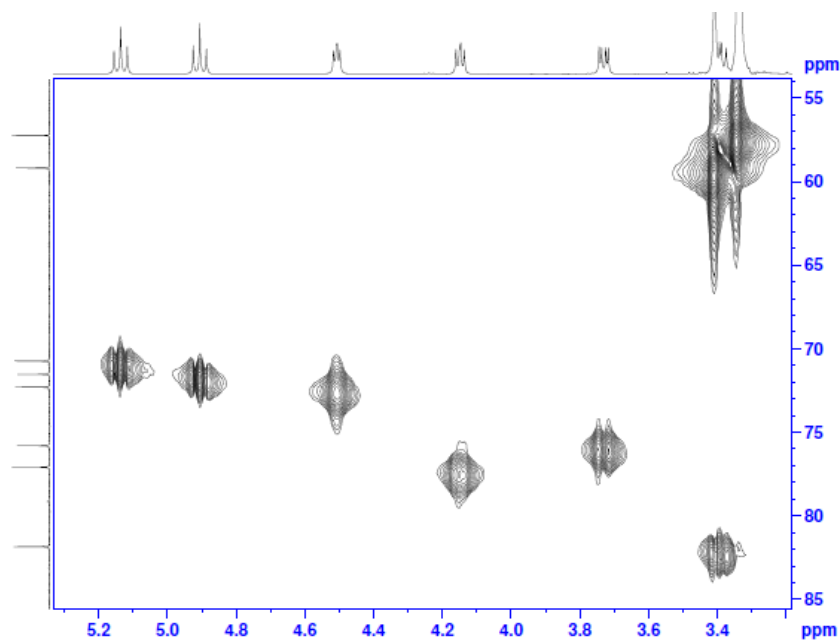

## <sup>1</sup>HNMR of compound (+)-35

KMS-D-500-1  
PROTON CDCl<sub>3</sub> E:\ IISER

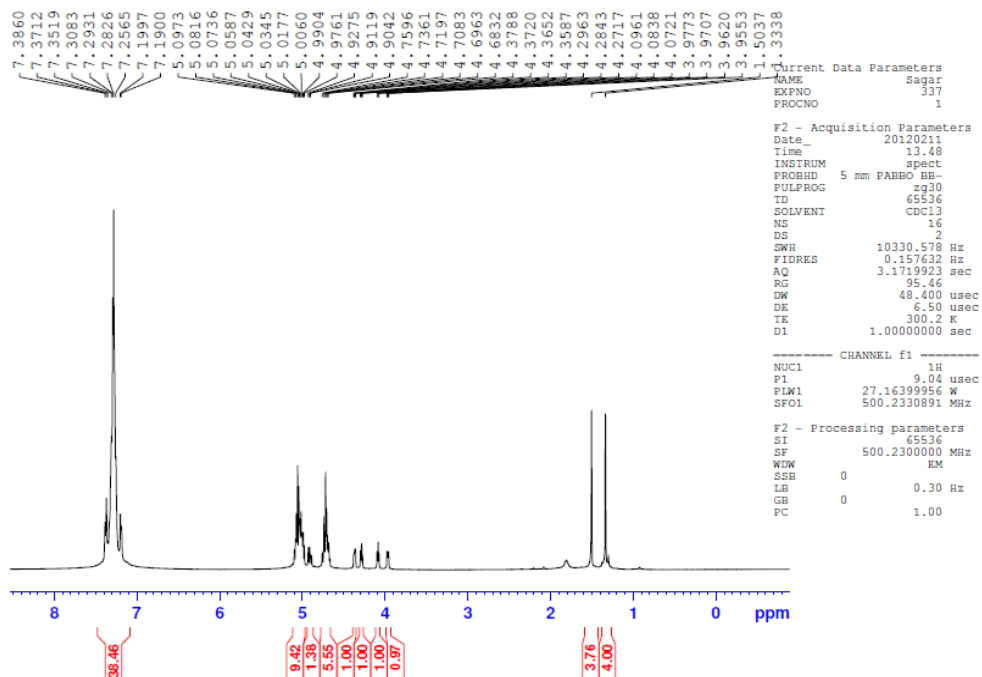

# <sup>31</sup>P NMR of compound (+)-35

KMS-D-500-1  
P31CPD CDCl3 E:\ IISER

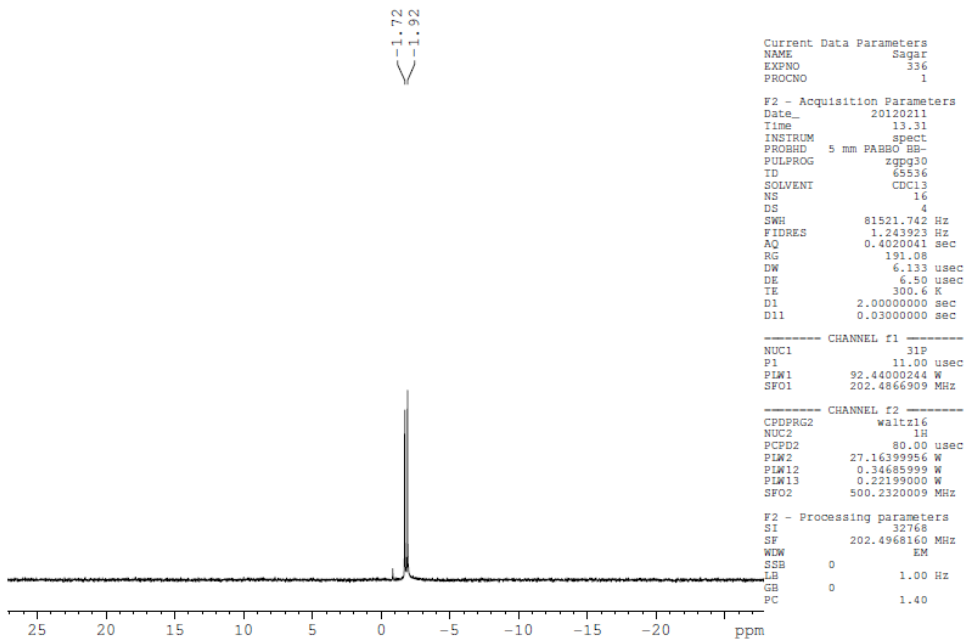

# <sup>1</sup>H NMR of compound (+)-36

KMS-D-501-2  
PROTON CDCl3 E:\ IISER

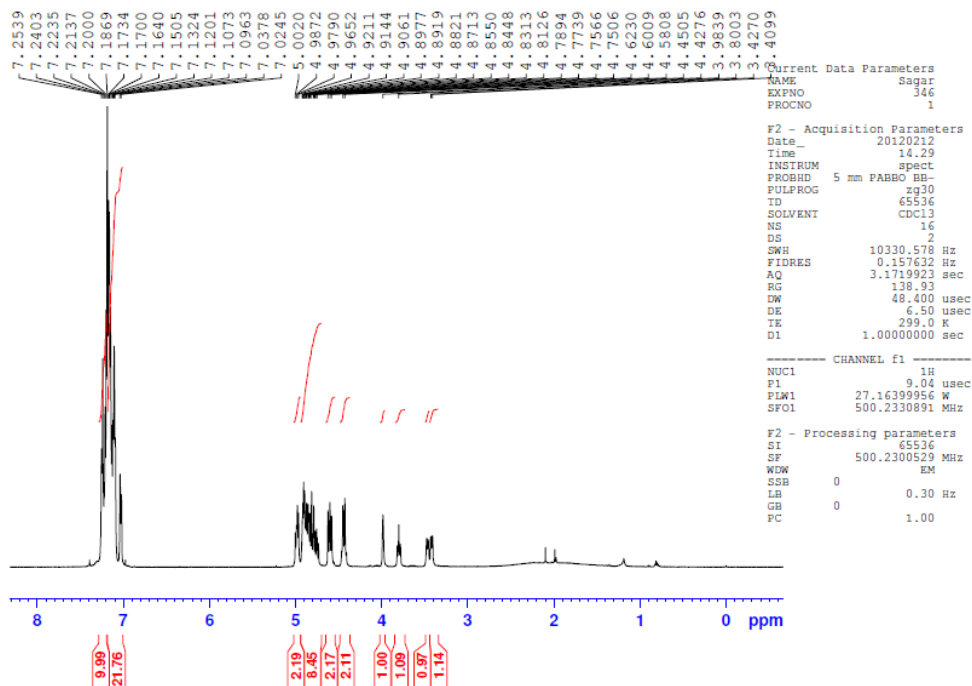

# <sup>31</sup>P NMR of compound (+)-36

KMS-D-502-1  
P31CPD CDCl3 E:\ IISER

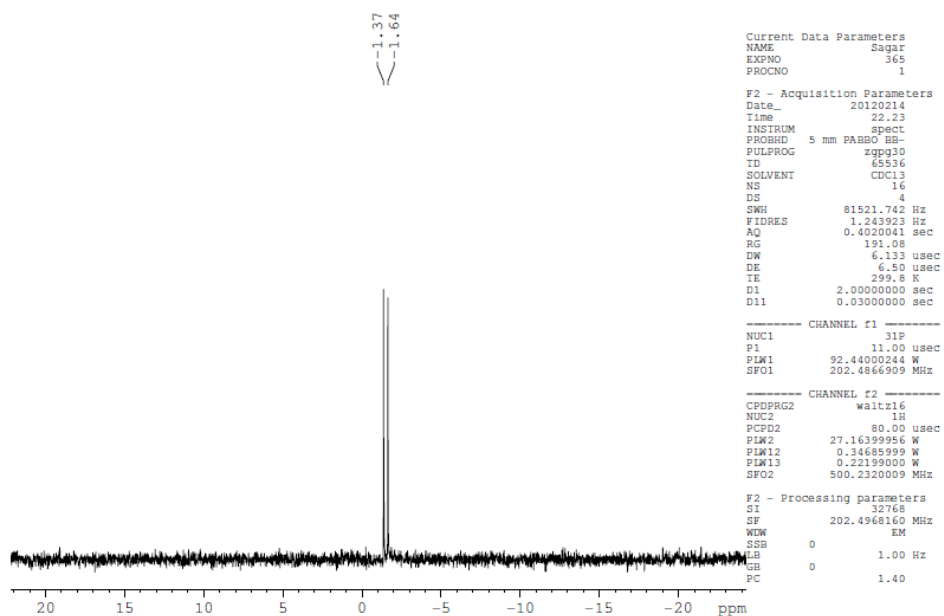

# <sup>31</sup>P NMR of crude compound after POCl<sub>3</sub> phosphorylation

KMS-D-517-3  
P31CPD CDCl3 E:\ IISER

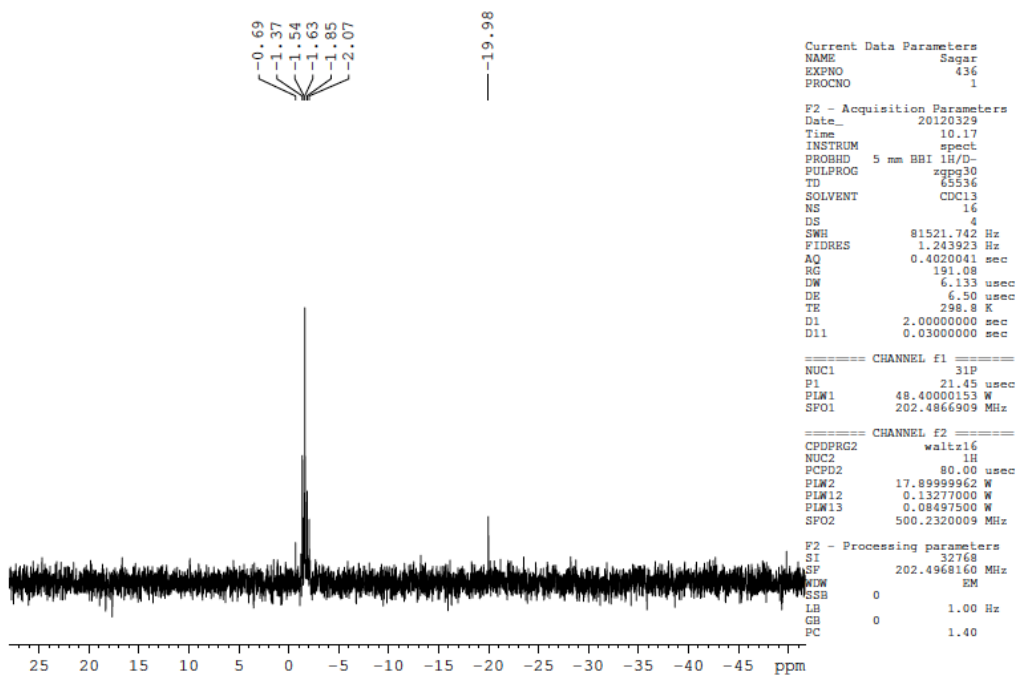

# <sup>1</sup>H NMR of compound 5 ( IP<sub>3</sub>)

PROTON-IISER E:\ IISER

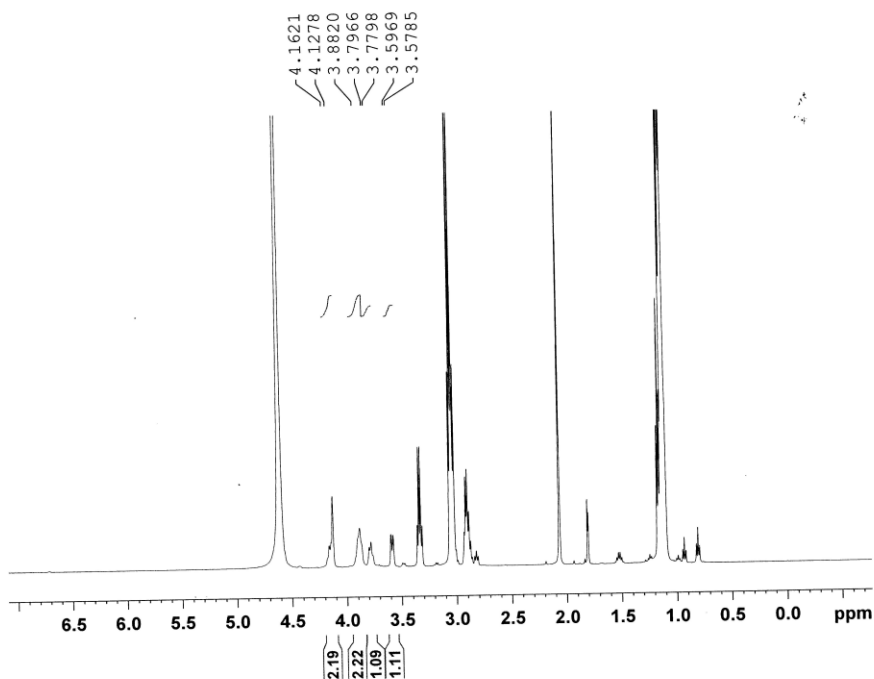

Current Data Parameters  
NAME Sagar  
EXPNO 477  
PROCNO 1

F2 - Acquisition Parameters  
Date\_ 20120416  
Time 9.31  
INSTRUM spect  
PROBHD 5 mm BBI 1H/D-  
PULPROG zg30  
TD 65536  
SOLVENT D2O  
NS 68  
DS 2  
SWH 10330.578 Hz  
FIDRES 0.157632 Hz  
AQ 3.1719923 sec  
RG 85.95  
DW 48.400 usec  
DE 6.50 usec  
TE 300.2 K  
D1 1.00000000 sec

===== CHANNEL f1 =====  
NUC1 1H  
P1 6.89 usec  
PLW1 17.89999962 W  
SFO1 500.2330891 MHz

F2 - Processing parameters  
SI 65536  
SF 500.2300520 MHz  
WDW EM  
SSB 0  
LB 0.10 Hz  
GB 0  
PC 1.00

# <sup>31</sup>P NMR of compound 5( IP<sub>3</sub>):

P31CPD E:\ IISER

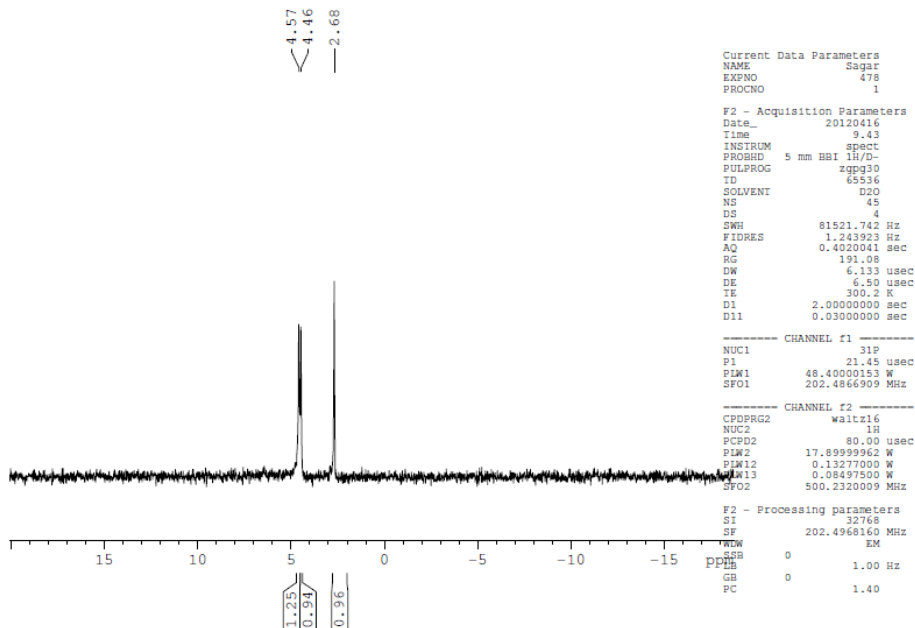

Current Data Parameters  
NAME Sagar  
EXPNO 478  
PROCNO 1

F2 - Acquisition Parameters  
Date\_ 20120416  
Time 9.43  
INSTRUM spect  
PROBHD 5 mm BBI 1H/D-  
PULPROG zgpg30  
TD 65536  
SOLVENT D2O  
NS 45  
DS 4  
SWH 81521.742 Hz  
FIDRES 1.243923 Hz  
AQ 0.4020041 sec  
RG 191.08  
DW 6.133 usec  
DE 6.50 usec  
TE 300.2 K  
D1 2.00000000 sec  
D11 0.03000000 sec

===== CHANNEL f1 =====  
NUC1 31P  
P1 21.45 usec  
PLW1 48.40000153 W  
SFO1 202.4864909 MHz

===== CHANNEL f2 =====  
CPDPRG2 waitz16  
NUC2 1H  
PCPD2 80.00 usec  
PLW2 17.89999962 W  
PLW12 0.13277000 W  
PLW13 0.08497500 W  
SFO2 500.2320009 MHz

F2 - Processing parameters  
SI 32768  
SF 202.4968160 MHz  
WDW EM  
SSB 0  
LB 1.00 Hz  
GB 0  
PC 1.40
